# Supplementary material for: Using Long-Term Historical Meteorological Data for Climate Change Analysis in the Carpathian Region
Source: MDPI journal article supplement (doi:10.3390/atmos13111751), 2022-10-24
Supplement: s1 [file s1]

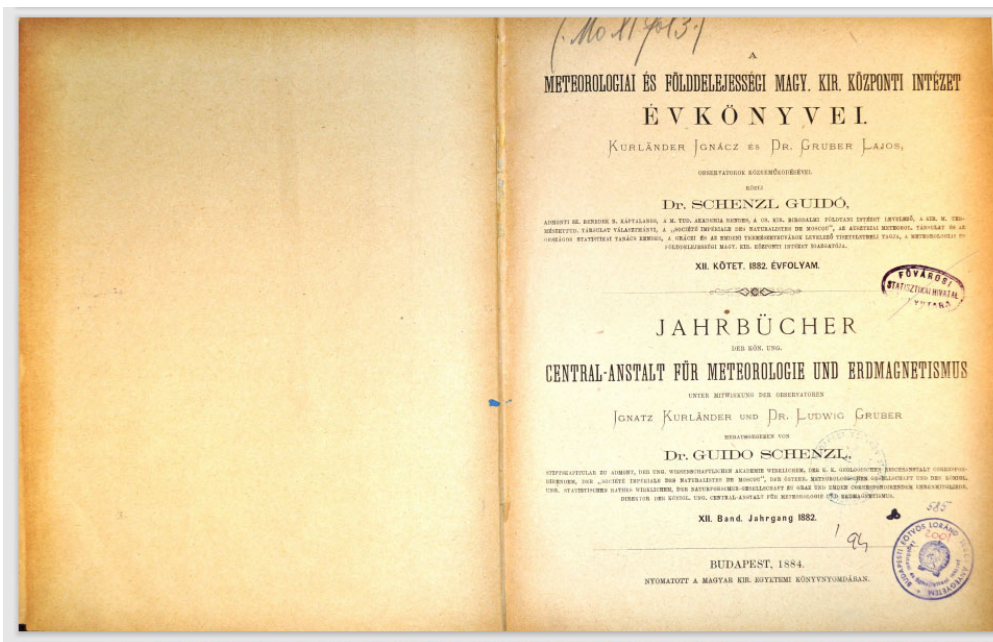

a.

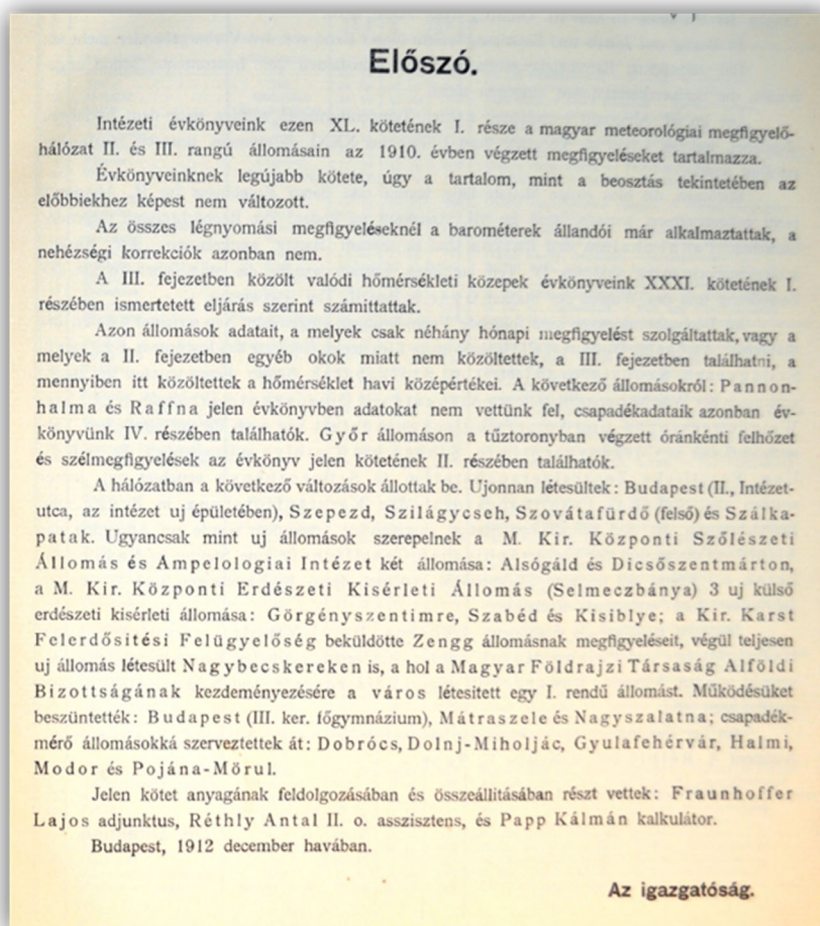

b.

**Azon állomások lajstroma, melyek az 1910. évben megfigyeléseiket az országos magyar kir. meteorológiai intézetnek beküldötték.**  
**Verzeichnis jener Stationen, welche im Jahre 1910 ihre Beobachtungen der königlich ungarischen Reichsanstalt einsandten.**

| Szám<br>Zahl | Állomás<br>Station        | Vármegye<br>Comitat | Föld-<br>közvetlen<br>Lap-<br>közvetlen | Föld-<br>közvetlen<br>Lap-<br>közvetlen | Föld-<br>közvetlen<br>Lap-<br>közvetlen | Magasság a tengerszint feletti<br>Höhe über Meer | A megfigyelő neve és állása<br>Name und Stand des Beobachters |
|--------------|---------------------------|---------------------|-----------------------------------------|-----------------------------------------|-----------------------------------------|--------------------------------------------------|---------------------------------------------------------------|
| 1            | Aknaszentgyörgy           | Máramaros           | 21° 56'                                 | 47° 47'                                 | 490                                     |                                                  | M. kir. főbányahivatal — K. ung. Salzbergwerk                 |
| 2            | Aknaszlatina              | "                   | 21° 52'                                 | 47° 57'                                 | 291                                     |                                                  | M. kir. főbányahivatal — K. ung. Oberbergamt                  |
| 3            | Albó                      | Vas                 | 16° 05'                                 | 47° 37'                                 | 313                                     |                                                  | Warkowicz Károly, ev. lelkész. — Ev. Pfarrer                  |
| 4            | Alsószék                  | Alsó-Fehér          | 24° 18'                                 | 46° 10'                                 | 300                                     |                                                  | Bárák Kemény Árpád uradalma — Gutverwaltung                   |
| 5            | Anina                     | Krassó-Szolnok      | 21° 51'                                 | 45° 04'                                 | 651                                     |                                                  | Molnár Lajos, tanító — Volksschullehrer                       |
| 6            | Arad                      | Arad                | 21° 19'                                 | 46° 11'                                 | 114                                     |                                                  | Dr. Foszgy Lajos, városi főorvos — Städt. Oberarzt            |
| 7            | Aranyvárja                | Arva                | 19° 21'                                 | 49° 16'                                 | 1163                                    |                                                  | Rusnyák Tamás, erdész — Förster                               |
| 8            | Babjagóra                 | Arva                | 19° 41'                                 | 49° 34'                                 | 1016                                    |                                                  | Mátyásfalvi János — Schutzhausaufseher d. Beskiden Vereins    |
| 9            | Bábolna                   | Komárom             | 17° 59'                                 | 47° 39'                                 | 139                                     |                                                  | Kotvas János, tanító — Volksschullehrer                       |
| 10           | Baja                      | Bács-Bodrog         | 18° 57'                                 | 46° 10'                                 | 111                                     |                                                  | Tanítóképző — Lehrerseminarie                                 |
| 11           | Balatonfüred              | Zala                | 17° 54'                                 | 46° 58'                                 | 146                                     |                                                  | Molnár Antal, árvaházi igazgató — Waisenhausdirektor          |
| 12           | Bárcskó                   | Arad                | 21° 17'                                 | 46° 06'                                 | 126                                     |                                                  | M. kir. áll. szőlőtelep — K. ung. Weinbaugut                  |
| 13           | Bárcskó (Prusina)         | Trencsén            | 18° 29'                                 | 49° 01'                                 | 381                                     |                                                  | Jancsek János, tanító — Volksschullehrer                      |
| 14           | Bánffy                    | Temes               | 20° 53'                                 | 44° 50'                                 | 82                                      |                                                  | Gardasági Ismétő iskola — Landwirth. Wiederholungsschule      |
| 15           | Békéscsaba                | Pest                | 19° 02'                                 | 47° 36'                                 | 115                                     |                                                  | Weber Károly, műkertész — Kunstgärtner                        |
| 16           | Békéscsaba                | Bihar               | 22° 21'                                 | 46° 40'                                 | 1853                                    |                                                  | Erdélyi János, mérnök — Ingenieur                             |
| 17           | Belovár                   | Belovár             | 16° 50'                                 | 45° 54'                                 | 133                                     |                                                  | Zorko F. József, főgymn. tanár — Gymn. Professor              |
| 18           | Benedháza                 | Zályom              | 19° 46'                                 | 48° 50'                                 | 549                                     |                                                  | M. kir. erdőgazdálkodás — K. ung. Forstverwaltung             |
| 19           | Beregszász                | Bereg               | 21° 59'                                 | 48° 13'                                 | 115                                     |                                                  | M. kir. áll. főgymnasium — Kön. ung. Obergymnasium            |
| 20           | Besztérce                 | Besztérce-Nass.     | 24° 50'                                 | 47° 07'                                 | 358                                     |                                                  | Bock Vilmos, földmívelő isk. igazg. — Ackerbauschulldirektor  |
| 21           | Bethlen                   | Szolnok-Doboka      | 24° 11'                                 | 47° 11'                                 | 264                                     |                                                  | Gramm Gyula m. kir. őrmester — Strassenaufseher               |
| 22           | Bettér                    | Gömör               | 20° 31'                                 | 48° 42'                                 | 341                                     |                                                  | Brennay Károly, tanító — Volksschullehrer                     |
| 23           | Bodviza                   | Somogy              | 17° 22'                                 | 46° 13'                                 | 130                                     |                                                  | Gubán Lajos, tanító — Volksschullehrer                        |
| 24           | Bóly                      | Brassó              | 25° 38'                                 | 45° 46'                                 | 5052                                    |                                                  | Cukorgyár — Zuckerfabrik                                      |
| 25           | Budapest (Ampel. int.)    | Pest                | 19° 01'                                 | 47° 12'                                 | 170                                     |                                                  | Ampelológiai intézet — Ampelolog. Institut.                   |
| 26           | Budapest (Gellérthegy)    | "                   | 19° 02'                                 | 47° 29'                                 | 130                                     |                                                  | M. kir. kertészeti tanintézet — Kgl. ung. Gartenbauschule     |
| 27           | Budapest (Krisztinaváros) | "                   | 19° 02'                                 | 47° 30'                                 | 156                                     |                                                  | Fővárosi vízműtelep — Hauptstätt. Wasserwerke                 |
| 28           | Budapest (Paedagogium)    | "                   | 19° 02'                                 | 47° 30'                                 | 156                                     |                                                  | Polgárisiskola tanárképző — Bürgerschullehrerseminarie        |
| 29           | Budapest (Fő-utca 6)      | "                   | 19° 02'                                 | 47° 30'                                 | 156                                     |                                                  | M. kir. orsz. meteorológiai intézet — Met. Reichsanstalt      |
| 30           | Budapest (Intézet-utca)   | "                   | 19° 02'                                 | 47° 31'                                 | 1296                                    |                                                  | M. kir. orsz. meteorológiai intézet — Met. Reichsanstalt      |
| 31           | Budapest (Kőbánya)        | "                   | 19° 10'                                 | 47° 28'                                 | 130                                     |                                                  | M. kir. áll. szőlőtelep — K. ung. Weinbaugut                  |
| 32           | Busttyháza                | Máramaros           | 23° 28'                                 | 48° 03'                                 | 200                                     |                                                  | M. kir. erdőhivatal — K. ung. Forstamt                        |
| 33           | Bükös                     | Nagyküküllő         | 24° 53'                                 | 46° 00'                                 | 452                                     |                                                  | Horváth András tanító — Volksschullehrer                      |
| 34           | Crikvenca                 | Modrus-Fiume        | 14° 41'                                 | 45° 10'                                 | 5                                       |                                                  | Kostrenčić Ivan közs. hivatalnok — Communal Beamter           |
| 35           | Csáktornya                | Zala                | 16° 26'                                 | 46° 23'                                 | 1654                                    |                                                  | Polesinszky Emil, tanító — Volksschullehrer                   |
| 36           | Csáka                     | Arad                | 21° 14'                                 | 46° 10'                                 | 107                                     |                                                  | M. kir. állami szőlőtelep — K. ung. Weinbaugut                |

c.

| 1900. Évi adatok — Jahresdaten                |              |                   |                           |                          |                                 |              |                   |                           |                          |                            |      |     |       |    |
|-----------------------------------------------|--------------|-------------------|---------------------------|--------------------------|---------------------------------|--------------|-------------------|---------------------------|--------------------------|----------------------------|------|-----|-------|----|
| Légtérny- és Levegő-Adatok — Luft-Temperatur  |              |                   |                           |                          | Napok száma — Zahl der Tage mit |              |                   |                           |                          | Szélirányok — Windrichtung |      |     |       |    |
| Maxi-<br>mum                                  | Mini-<br>mum | Nap-<br>közvetlen | Relat.<br>Nagy-<br>Mittag | Relat.<br>Kis-<br>Mittag | Maxi-<br>mum                    | Mini-<br>mum | Nap-<br>közvetlen | Relat.<br>Nagy-<br>Mittag | Relat.<br>Kis-<br>Mittag | N                          | NE   | E   | SE    | SW |
| Nagy-Szeben                                   |              |                   |                           |                          |                                 |              |                   |                           |                          |                            |      |     |       |    |
| I = 41° 49'      p = 45° 47'      H = 4144 M. |              |                   |                           |                          |                                 |              |                   |                           |                          |                            |      |     |       |    |
| Január                                        | 74° 20'      | 36° 20'           | 212° 28'                  | - 0° 30'                 | 108                             | 30           | - 70              | 28                        | 45                       | 32                         | 35   | 10  | 66    | 66 |
| Február                                       | 21° 34'      | 35                | 110                       | 14                       | 17                              | 87           | 39                | 45                        | 15                       | 14                         | - 48 | 18  | 50    | 82 |
| Március                                       | 27° 37'      | 10                | 098                       | 36                       | - 21                            | 45           | 03                | 09                        | 102                      | 20                         | - 02 | 4   | 64    | 80 |
| Április                                       | 24° 35'      | 21                | 103                       | 8                        | 72                              | 144          | 84                | 100                       | 198                      | 23                         | 02   | 4   | 64    | 80 |
| Május                                         | 27° 31'      | 21                | 103                       | 10                       | 126                             | 197          | 133               | 152                       | 274                      | 27                         | 02   | 11  | 85    | 70 |
| Június                                        | 24° 20'      | 11                | 188                       | 26                       | 102                             | 232          | 157               | 184                       | 274                      | 4                          | 5    | 118 | 105   | 70 |
| Július                                        | 25° 32'      | 21                | 166                       | 12                       | 177                             | 178          | 185               | 213                       | 330                      | 21                         | 100  | 11  | 120   | 70 |
| Augusztus                                     | 28° 30'      | 21                | 208                       | 6                        | 155                             | 255          | 171               | 194                       | 276                      | 28                         | 113  | 15  | 111   | 88 |
| Szeptember                                    | 29° 14'      | 23                | 255                       | 11                       | 90                              | 232          | 140               | 150                       | 295                      | 28                         | 55   | 21  | 100   | 82 |
| Oktober                                       | 28° 27'      | 8                 | 173                       | 15                       | 73                              | 178          | 89                | 113                       | 208                      | 1                          | - 47 | 26  | 81    | 89 |
| November                                      | 28° 31'      | 8                 | 144                       | 36                       | 32                              | 109          | 59                | 67                        | 178                      | 10                         | - 05 | 11  | 56    | 87 |
| December                                      | 27° 37'      | 12                | 124                       | 2                        | - 09                            | 25           | 05                | 07                        | 130                      | 1                          | - 70 | 28  | 44    | 84 |
| Év — Jahr                                     | 255          | 284               | 10                        | 10                       | 708                             | 30           | 73                | 151                       | 89                       | 104                        | 350  | 21  | - 142 | 5  |
|                                               |              |                   |                           |                          |                                 |              |                   |                           |                          |                            | 73   | 86  | 62    | 33 |

d.



| Nagy-Szeben |                        |       |       |                                 |      |      |                           |     |     |                       |     |     |                                                              |     |     |                           |
|-------------|------------------------|-------|-------|---------------------------------|------|------|---------------------------|-----|-----|-----------------------|-----|-----|--------------------------------------------------------------|-----|-----|---------------------------|
| Január      |                        |       | 1900. |                                 |      |      |                           |     |     |                       |     |     |                                                              |     |     |                           |
| Nap         | Légnyomás<br>Luftdruck |       |       | Hőmérséklet C°<br>Temperatur C° |      |      | Nedvesség<br>Feuchtigkeit |     |     | Felhőzet<br>Bewölkung |     |     | Szélirány és erősség (1-10)<br>Windrichtung u. Stärke (1-10) |     |     | Csapad.-k<br>Niederschlag |
|             | 7h                     | 2h    | 9h    | 7h                              | 2h   | 9h   | 7h                        | 2h  | 9h  | 7h                    | 2h  | 9h  | 7h                                                           | 2h  | 9h  |                           |
| 1           | 733'8                  | 733'1 | 733'5 | -1'8                            | 2'3  | 0'8  | 100                       | 80  | 92  | 10                    | 10  | 5   | SE                                                           | 1   | SE  | 1                         |
| 2           | 31'4                   | 29'6  | 29'0  | 0'2                             | 5'2  | 1'5  | 89                        | 72  | 98  | 5                     | 10  | 5   | SE                                                           | 1   | SE  | 1                         |
| 3           | 25'7                   | 25'2  | 24'6  | 2'4                             | 4'8  | 3'2  | 93                        | 87  | 93  | 10                    | 10  | 10  | SE                                                           | 1   | SE  | 1                         |
| 4           | 21'6                   | 21'6  | 21'3  | 2'3                             | 6'0  | 1'8  | 94                        | 85  | 93  | 10                    | 10  | 4   | SE                                                           | 1   | SE  | 1                         |
| 5           | 21'5                   | 20'8  | 22'7  | 0'2                             | 8'2  | 6'4  | 92                        | 85  | 94  | 2                     | 8   | 5   | SE                                                           | 1   | SE  | 1                         |
| 6           | 26'5                   | 28'9  | 30'3  | 3'4                             | 9'9  | 3'2  | 93                        | 80  | 97  | 5                     | 5   | 10  | SSE                                                          | 1   | SSE | 1                         |
| 7           | 28'9                   | 28'1  | 27'1  | 2'6                             | 6'6  | 2'8  | 100                       | 83  | 100 | 10                    | 10  | 10  | WNW                                                          | 1   | WNW | 1                         |
| 8           | 24'8                   | 24'1  | 24'5  | 3'8                             | 4'8  | 1'6  | 77                        | 90  | 75  | 10                    | 10  | 10  | WNW                                                          | 1   | SSE | 4                         |
| 9           | 25'9                   | 27'8  | 28'9  | -0'6                            | 1'6  | -2'5 | 88                        | 76  | 98  | 10                    | 10  | 10  | SE                                                           | 3   | SE  | 4                         |
| 10          | 28'1                   | 26'6  | 26'3  | -4'2                            | -0'8 | -3'4 | 84                        | 79  | 89  | 10                    | 10  | 5   | SE                                                           | 4   | SE  | 3                         |
| 11          | 25'5                   | 25'6  | 25'5  | -3'4                            | -1'4 | -3'4 | 89                        | 76  | 76  | 10                    | 10  | 10  | SE                                                           | 3   | SE  | 4                         |
| 12          | 25'7                   | 26'7  | 28'0  | -4'3                            | -1'8 | -3'6 | 89                        | 90  | 93  | 10                    | 0   | 0   | SE                                                           | 3   | SE  | 3                         |
| 13          | 28'7                   | 28'1  | 27'5  | 4'4                             | -1'5 | -3'2 | 100                       | 100 | 100 | 10                    | 10  | 10  | SE                                                           | 2   | E   | 2                         |
| 14          | 26'8                   | 25'7  | 24'8  | -4'6                            | 0'8  | -1'2 | 95                        | 82  | 100 | 7                     | 10  | 10  | E                                                            | 1   | E   | 2                         |
| 15          | 24'0                   | 24'8  | 25'7  | -2'2                            | 0'5  | -1'9 | 100                       | 75  | 100 | 10                    | 10  | 10  | E                                                            | 1   | E   | 1                         |
| 16          | 25'5                   | 24'7  | 24'2  | -2'0                            | 0'2  | -1'0 | 100                       | 96  | 82  | 10                    | 10  | 10  | E                                                            | 1   | NNE | 1                         |
| 17          | 22'3                   | 20'4  | 21'1  | 3'0                             | -0'8 | -0'6 | 100                       | 96  | 92  | 10                    | 10  | 10  | NNE                                                          | 1   | NNE | 1                         |
| 18          | 20'6                   | 20'2  | 21'0  | 0'6                             | 3'0  | 2'5  | 100                       | 91  | 91  | 10                    | 10  | 10  | NNE                                                          | 1   | WNW | 4                         |
| 19          | 22'6                   | 25'3  | 28'8  | 0'4                             | 5'2  | 2'0  | 100                       | 69  | 96  | 10                    | 10  | 10  | NW                                                           | 1   | NW  | 1                         |
| 20          | 33'2                   | 35'8  | 35'9  | 0'6                             | 2'0  | 1'0  | 100                       | 96  | 96  | 10                    | 10  | 7   | NW                                                           | 1   | S   | 1                         |
| 21          | 33'9                   | 32'6  | 32'2  | -3'6                            | 0'5  | -3'7 | 87                        | 82  | 95  | 5                     | 3   | 0   | S                                                            | 1   | S   | 1                         |
| 22          | 30'5                   | 28'0  | 27'3  | -2'6                            | -0'6 | -1'7 | 96                        | 100 | 90  | 10                    | 10  | 10  | W                                                            | 1   | W   | 1                         |
| 23          | 26'7                   | 26'4  | 26'7  | -2'4                            | -0'8 | -1'6 | 94                        | 96  | 94  | 10                    | 10  | 10  | ESE                                                          | 1   | ESE | 1                         |
| 24          | 24'8                   | 24'1  | 25'0  | 0'4                             | 4'9  | 2'9  | 89                        | 86  | 91  | 9                     | 5   | 0   | SE                                                           | 1   | W   | 2                         |
| 25          | 23'4                   | 21'0  | 20'4  | 0'6                             | 6'0  | 2'8  | 92                        | 97  | 100 | 2                     | 10  | 10  | SSE                                                          | 1   | SSE | 1                         |
| 26          | 20'2                   | 22'0  | 23'9  | 1'2                             | 2'0  | 0'2  | 92                        | 100 | 100 | 10                    | 10  | 10  | SE                                                           | 2   | SE  | 1                         |
| 27          | 23'2                   | 20'5  | 19'2  | 9'0                             | 4'8  | -1'5 | 96                        | 96  | 94  | 10                    | 2   | 0   | SE                                                           | 1   | SW  | 1                         |
| 28          | 16'5                   | 12'4  | 12'5  | -5'0                            | 2'0  | 2'2  | 100                       | 83  | 96  | 0                     | 7   | 0   | SE                                                           | 1   | SSE | 3                         |
| 29          | 13'7                   | 15'6  | 15'6  | 3'0                             | 5'0  | 7'2  | 66                        | 69  | 55  | 2                     | 5   | 10  | S                                                            | 6   | SE  | 3                         |
| 30          | 14'4                   | 12'8  | 14'5  | 8'3                             | 0'8  | 6'2  | 67                        | 65  | 88  | 5                     | 4   | 10  | SE                                                           | 3   | SSE | 5                         |
| 31          | 15'1                   | 18'9  | 21'8  | 4'3                             | 6'8  | 1'6  | 92                        | 76  | 89  | 2                     | 8   | 0   | S                                                            | 5   | S   | 3                         |
| M           | 724'7                  | 724'4 | 724'8 | -0'4                            | 3'0  | 0'6  | 92                        | 85  | 92  | 7'5                   | 8'0 | 6'9 | 2'0                                                          | 1'9 | 1'7 | 18'6                      |

e.

| III. A gyümölcsérés kezdete.                                              |                            |                    |                                          |                                          |                                          |                    |                                          |
|---------------------------------------------------------------------------|----------------------------|--------------------|------------------------------------------|------------------------------------------|------------------------------------------|--------------------|------------------------------------------|
| III. Beginn der Frucht reife.                                             |                            |                    |                                          |                                          |                                          |                    |                                          |
| A.                                                                        |                            |                    |                                          |                                          |                                          |                    |                                          |
| A növény neve<br>Name der Pflanze                                         | Közép- és<br>Mittlere Zone |                    |                                          | Déli és. — Mittlere Zone.                |                                          |                    |                                          |
|                                                                           | Közép                      | Közép              | Bakonyok                                 | Pecs                                     | Mittlere                                 | Türk. Bors         | Nagy-Szeben                              |
| Ribes rubrum L. — vereb ribizke, gem. Johannis-<br>beere . . . . .        | —                          | —                  | 6.16                                     | 5.24                                     | 5.26                                     | 6.20               | 6.18                                     |
| Sambucus nigra L. — bodza, Hollander . . . . .                            | —                          | —                  | 8.10                                     | 9.5                                      | 7.5                                      | —                  | 8.1                                      |
| Cornus sanguinea L. — veregyűrű som, rother<br>Hortriegl . . . . .        | —                          | —                  | 8.20                                     | 9.30                                     | 8.1                                      | 8.10               | 8.20                                     |
| Ligustrum vulgare L. — vessző fagyal, Rainweide                           | —                          | —                  | —                                        | —                                        | —                                        | —                  | 9.10                                     |
| Aesculus Hippocastanum L. — vad gesztenye, wilde<br>Roskastanie . . . . . | —                          | —                  | — <sup>1)</sup>                          | 9.19                                     | 9.5                                      | 9.20               | 9.25                                     |
| Secale cereale L. kib. — teli rozs, Winterroggen . . .                    | 6.30 <sup>1)</sup>         | 7.1 <sup>1)</sup>  | 7.2 <sup>1)</sup><br>7.12 <sup>1)</sup>  | 6.20 <sup>1)</sup><br>7.15 <sup>1)</sup> | 7.4 <sup>1)</sup>                        | 7.4 <sup>1)</sup>  | 7.5 <sup>1)</sup>                        |
| Hordium vulgare L. kib. — teli árpa, Wintergerste                         | 7.15 <sup>1)</sup>         | 7.1 <sup>1)</sup>  | 7.10 <sup>1)</sup><br>7.15 <sup>1)</sup> | 6.10 <sup>1)</sup><br>6.28 <sup>1)</sup> | 6.28 <sup>1)</sup>                       | 6.20 <sup>1)</sup> | —                                        |
| Triticum vulgare Vill. — búza, Weizen . . . . .                           | 6.5 <sup>1)</sup>          | 6.29 <sup>1)</sup> | 7.18 <sup>1)</sup><br>7.29 <sup>1)</sup> | 6.23 <sup>1)</sup><br>7.11 <sup>1)</sup> | 7.14 <sup>1)</sup>                       | 7.4 <sup>1)</sup>  | —                                        |
| Zea Mays L. — tengeri, kukorica, türkischer Mais,<br>Kukurutz . . . . .   | —                          | —                  | 10.1 <sup>1)</sup>                       | 9.5                                      | 8.28 <sup>1)</sup><br>9.20 <sup>1)</sup> | 9.2 <sup>1)</sup>  | 9.17 <sup>1)</sup><br>10.5 <sup>1)</sup> |
| Vitis vinifera L. — szőlő, Weinlese . . . . .                             | 10.16 <sup>1)</sup>        | 10.3 <sup>1)</sup> | — <sup>1)</sup>                          | 10.10 <sup>1)</sup>                      | 8.20 <sup>1)</sup><br>9.28 <sup>1)</sup> | 9.20 <sup>1)</sup> | 9.2 <sup>1)</sup><br>10.21 <sup>1)</sup> |

<sup>1)</sup> Az érés, illet. szüret kezdete. — Beginn der Ernte, resp. Weinlese.  
<sup>2)</sup> Elfagyott. — Erfroren.  
<sup>3)</sup> Korai. — Frühzeitiger Mais.  
<sup>4)</sup> Nem fordul itt elő. — Kommt hier nicht vor.  
<sup>5)</sup> Egyes bogrők. — Einzelne Boeren.  
<sup>6)</sup> Egyes oszlopok. — Einzelne Kolken.

f.

Figure S1. The structure of The Royal Hungarian Central Institute of Meteorology and Earth Magnetism (RHCIMEM) yearbooks; a.- inside cover page, b.- preface, c.- list of stations, d.- monthly meteorological observations, e.- daytime meteorological observations, f.- agrometeorological observations

Table S1. The spatial means of the main verification statistics of MASH homogenization process

| 24h mean temperature                  |        |        |        |       |       |       |       |       |       |       |       |        |
|---------------------------------------|--------|--------|--------|-------|-------|-------|-------|-------|-------|-------|-------|--------|
|                                       | Months |        |        |       |       |       |       |       |       |       |       |        |
| Significance Level: 0.05              | 1      | 2      | 3      | 4     | 5     | 6     | 7     | 8     | 9     | 10    | 11    | 12     |
| Critical Value                        | 20.86  | 20.86  | 20.86  | 20.86 | 20.86 | 20.86 | 20.86 | 20.86 | 20.86 | 20.86 | 20.86 | 20.86  |
| Test Statistics Before Homogenization | 30.60  | 174.67 | 114.86 | 88.58 | 52.69 | 62.43 | 88.35 | 51.33 | 66.81 | 73.75 | 43.39 | 146.89 |
| Test Statistics After Homogenization  | 18.70  | 16.44  | 18.36  | 18.71 | 23.75 | 20.53 | 20.24 | 17.26 | 19.92 | 22.10 | 18.82 | 19.42  |
| Relative Modification of Series       | 0.09   | 0.12   | 0.12   | 0.16  | 0.14  | 0.22  | 0.28  | 0.18  | 0.22  | 0.20  | 0.11  | 0.19   |
| Representativity of Station Network   | 0.79   | 0.76   | 0.81   | 0.77  | 0.76  | 0.71  | 0.66  | 0.69  | 0.75  | 0.77  | 0.81  | 0.81   |
| Precipitation                         |        |        |        |       |       |       |       |       |       |       |       |        |
|                                       | Months |        |        |       |       |       |       |       |       |       |       |        |
| Significance Level: 0.05              | 1      | 2      | 3      | 4     | 5     | 6     | 7     | 8     | 9     | 10    | 11    | 12     |
| Critical Value                        | 31.00  | 31.00  | 31.00  | 31.00 | 31.00 | 31.00 | 31.00 | 31.00 | 31.00 | 31.00 | 31.00 | 31.00  |
| Test Statistics Before Homogenization | 20.19  | 15.61  | 22.44  | 29.17 | 24.35 | 22.65 | 21.04 | 23.06 | 20.43 | 25.99 | 23.22 | 21.49  |
| Test Statistics After Homogenization  | 19.44  | 15.84  | 19.72  | 21.65 | 17.58 | 19.75 | 15.26 | 23.06 | 19.98 | 15.87 | 21.73 | 17.84  |
| Relative Modification of Series       | 0.02   | 0.02   | 0.14   | 0.07  | 0.10  | 0.07  | 0.06  | 0.00  | 0.16  | 0.03  | 0.03  | 0.04   |
| Representativity of Station Network   | 0.40   | 0.41   | 0.39   | 0.35  | 0.33  | 0.25  | 0.26  | 0.29  | 0.38  | 0.42  | 0.42  | 0.36   |

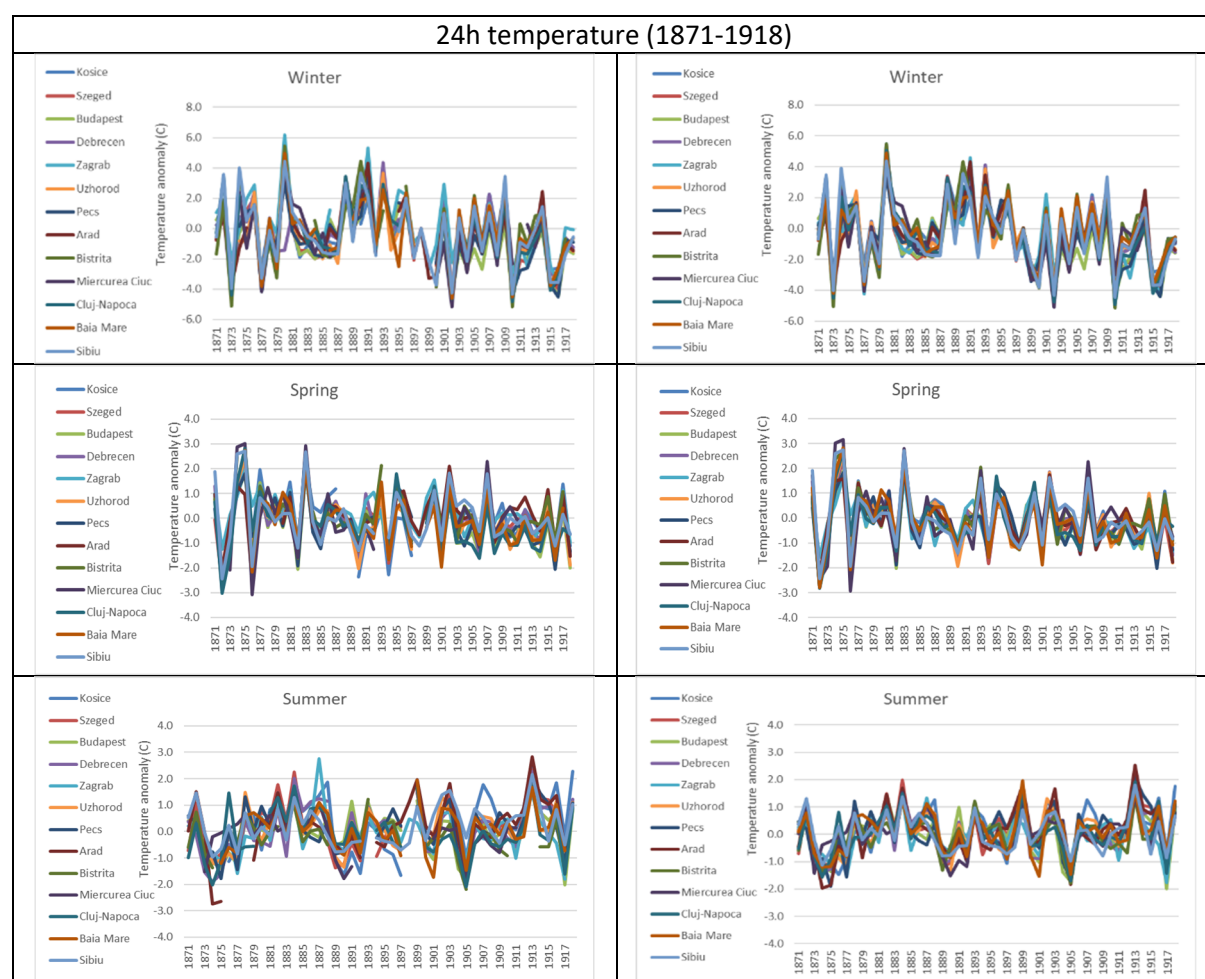



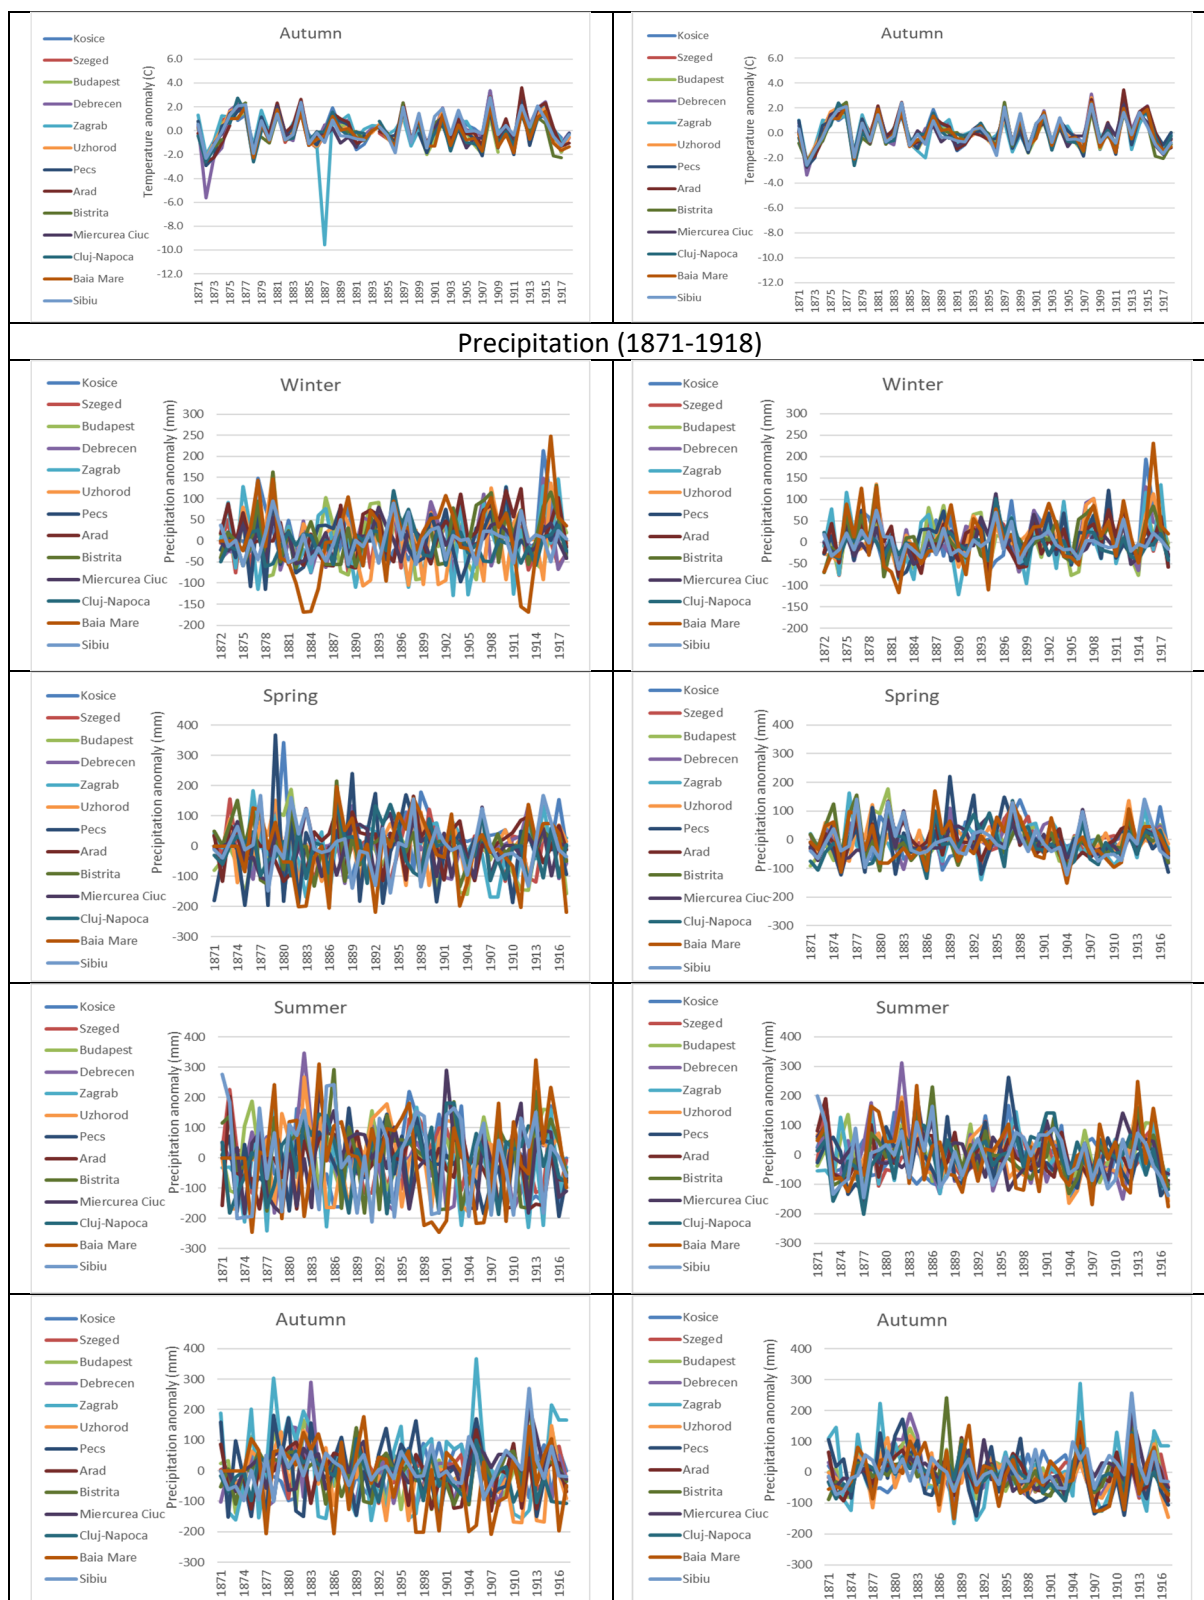

Figure S2. The seasonal anomalies (reference period 1871-1901) of 24h temperature (upper) and precipitation (bottom) in the historical period (1871-1918) before (left) and after (right) the homogenization using MASH method

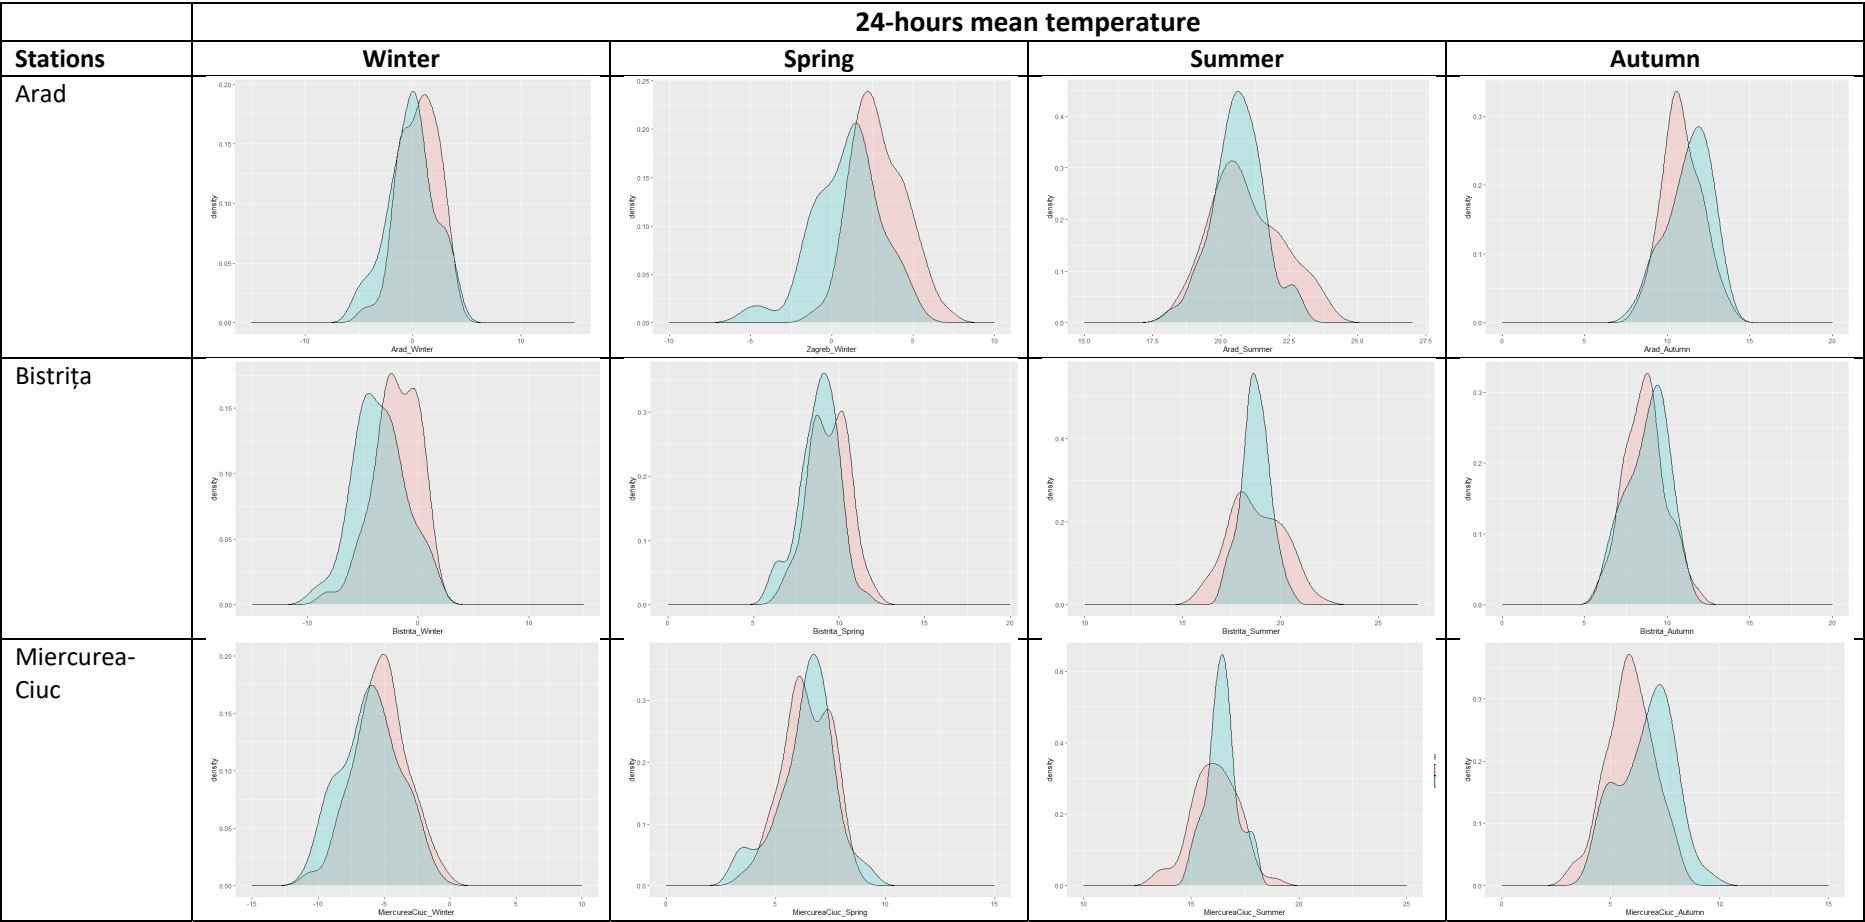



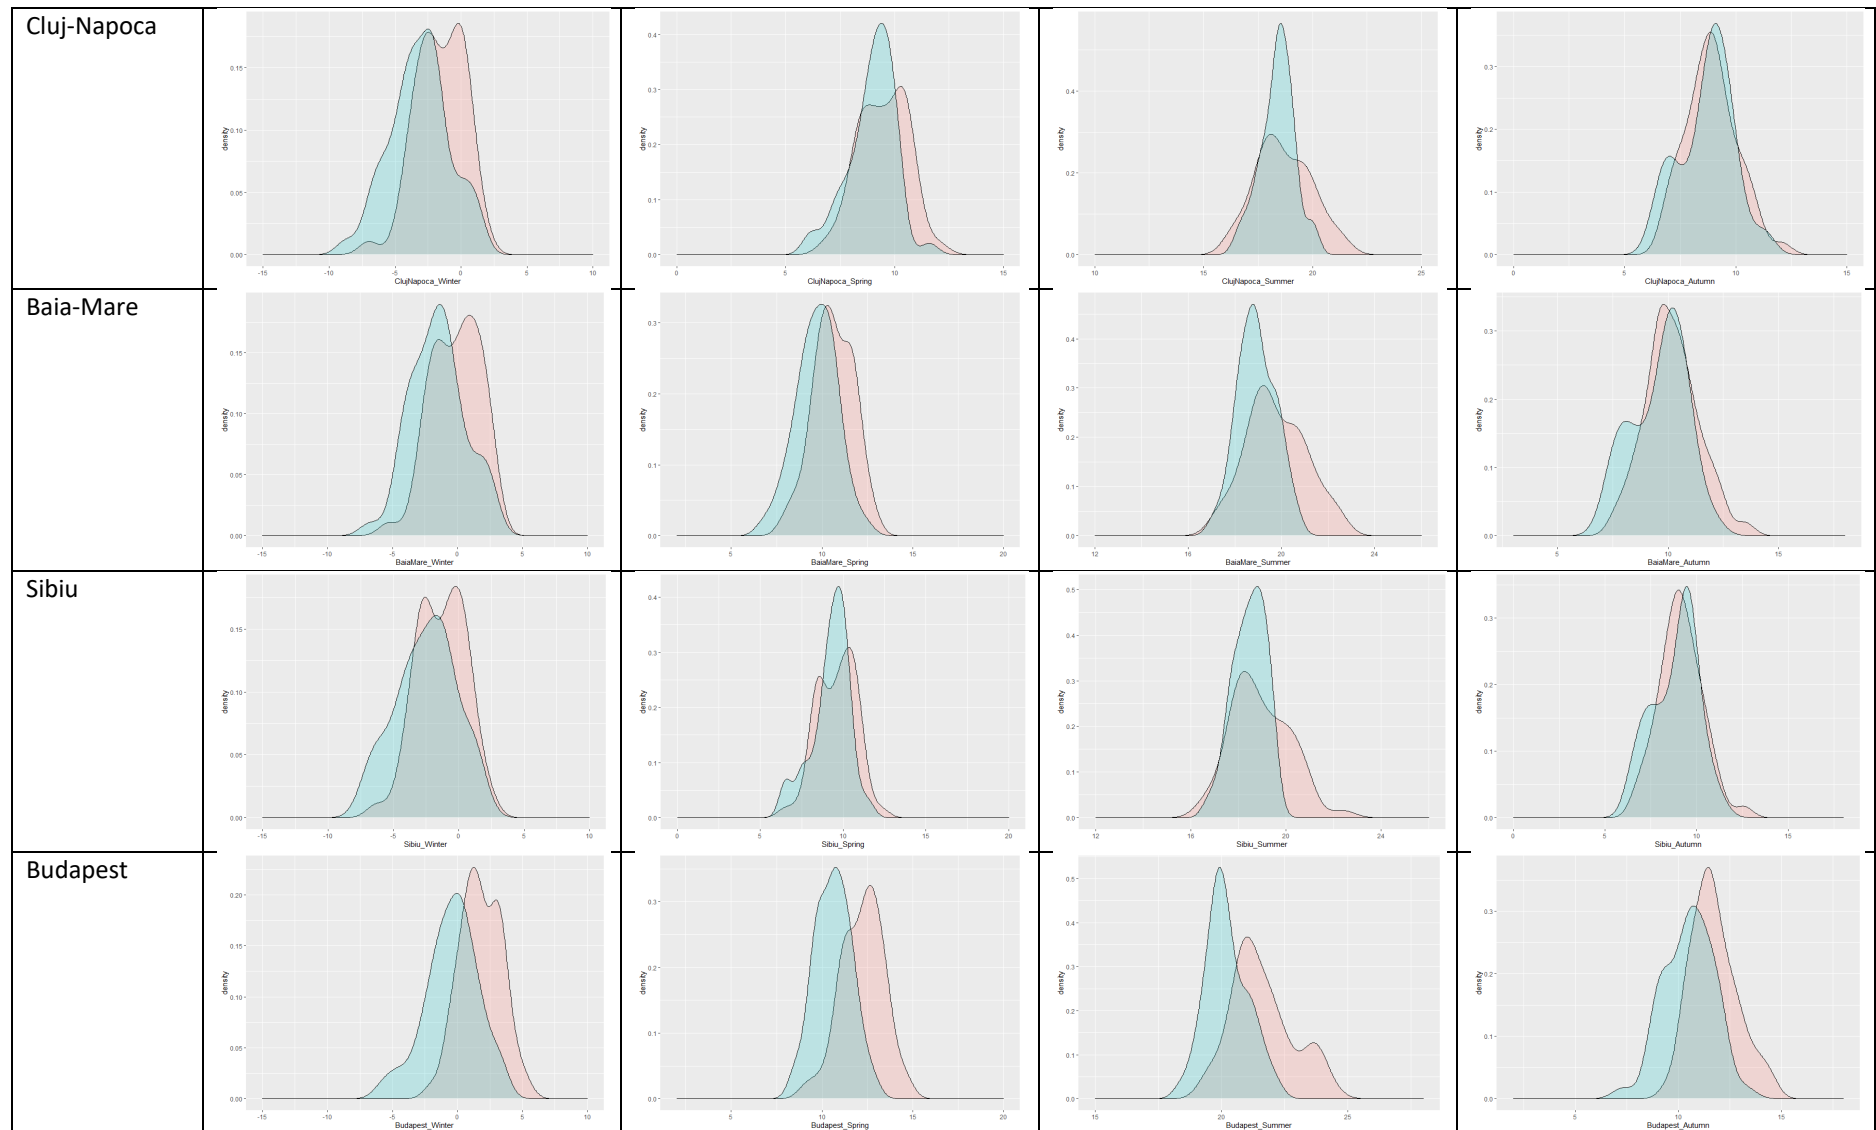

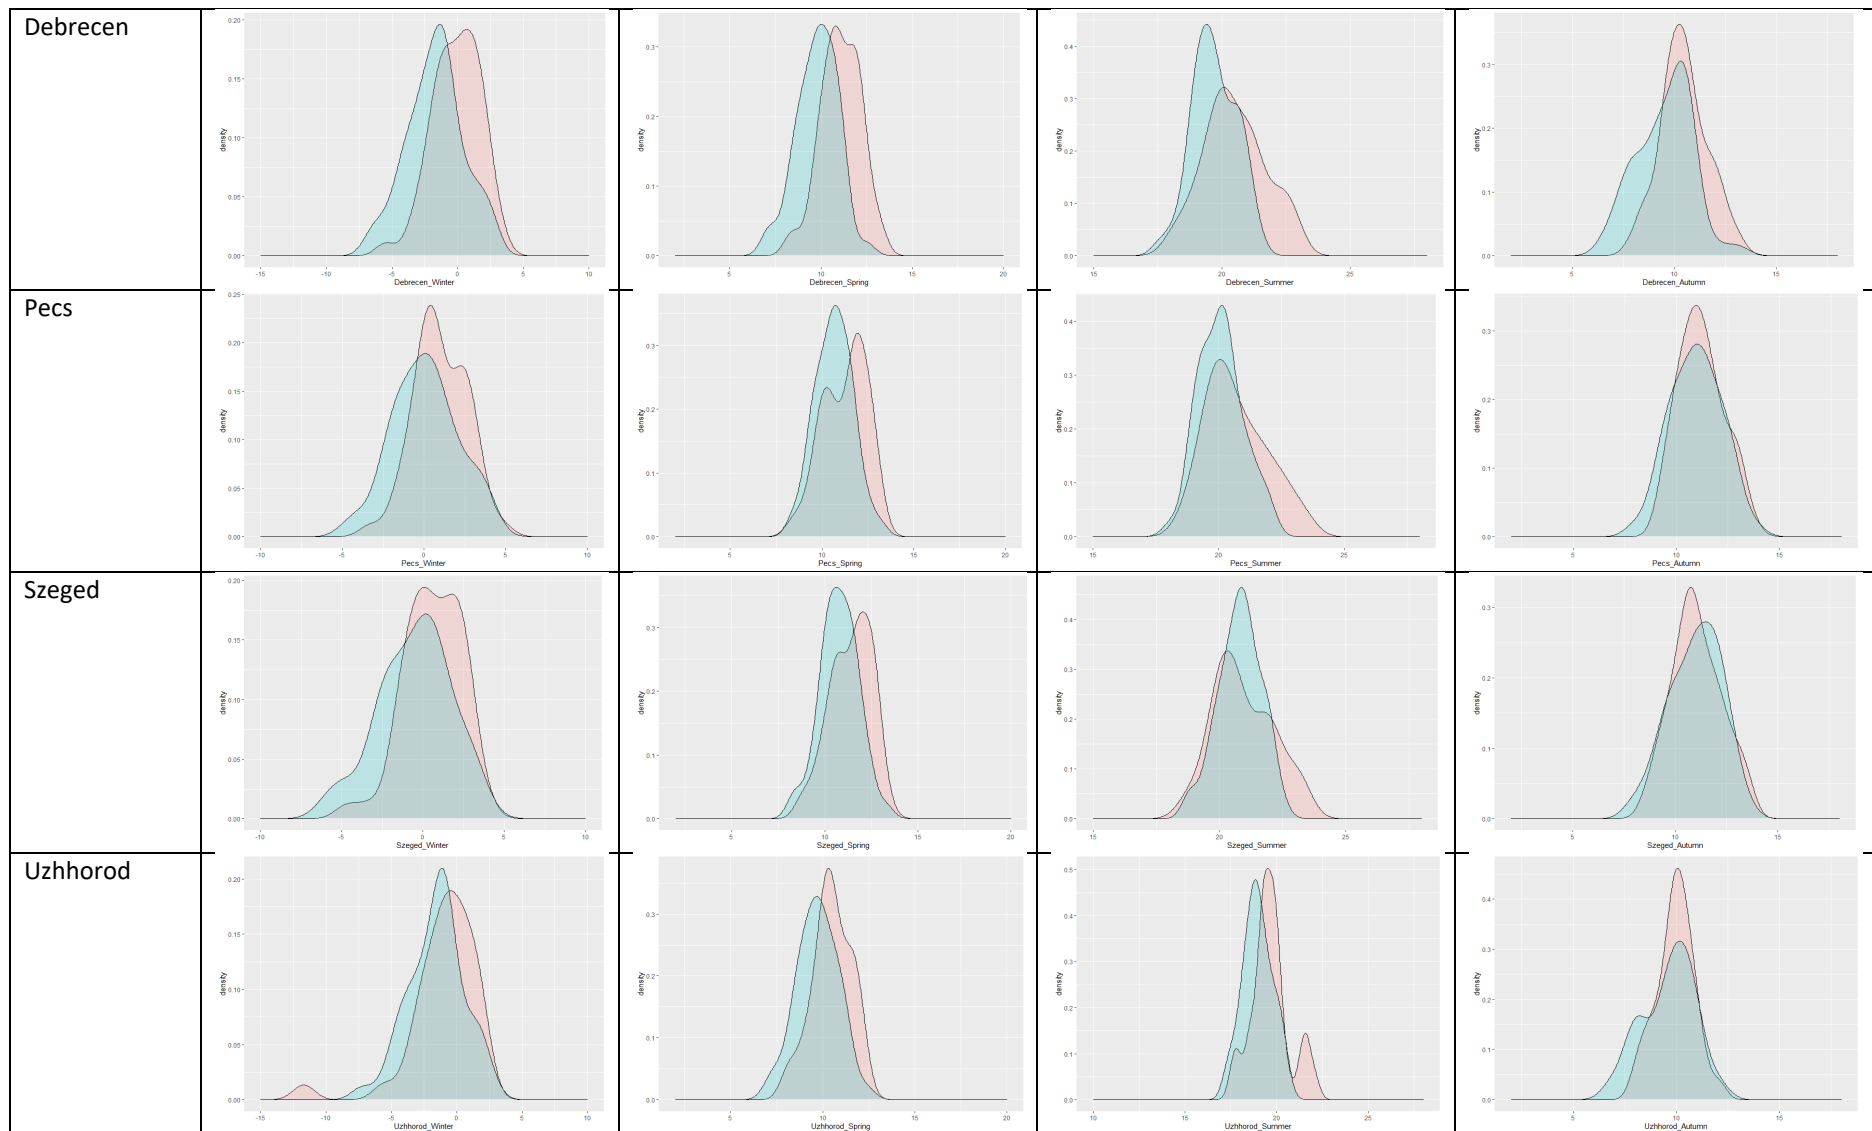



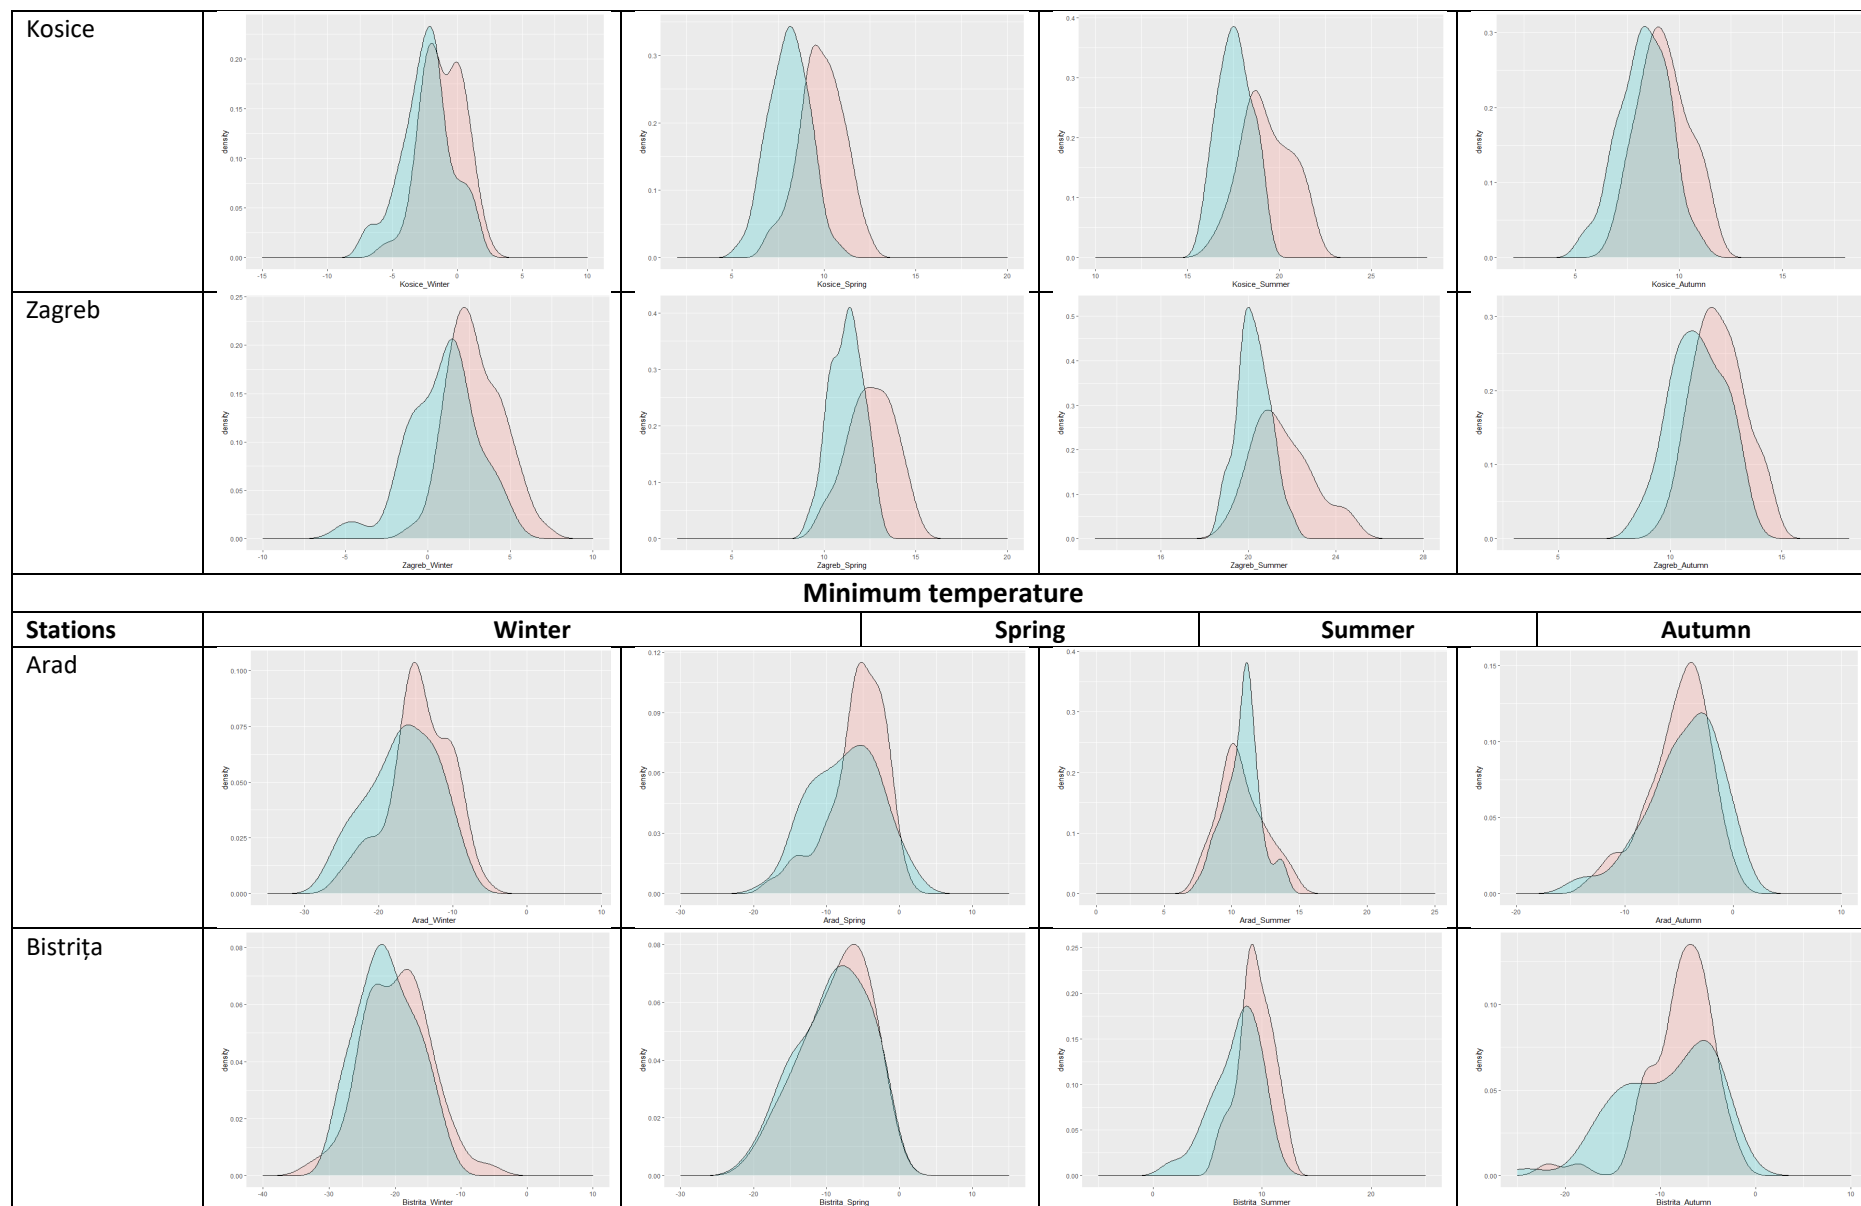

Miercurea-Ciuc

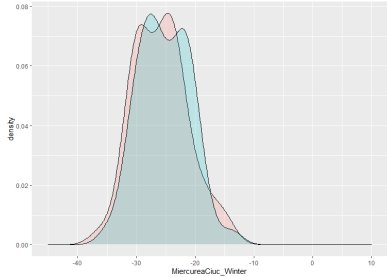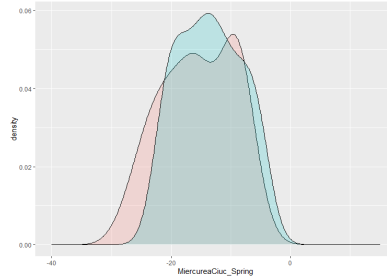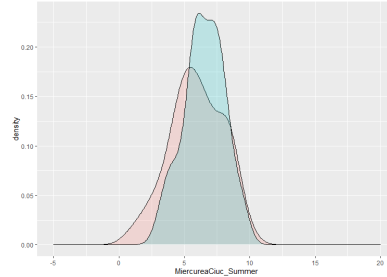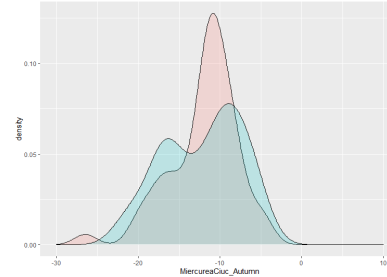

Cluj-Napoca

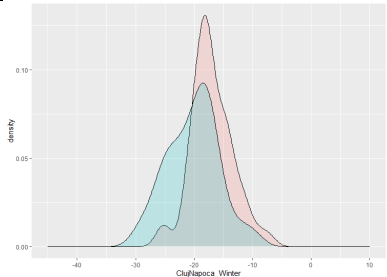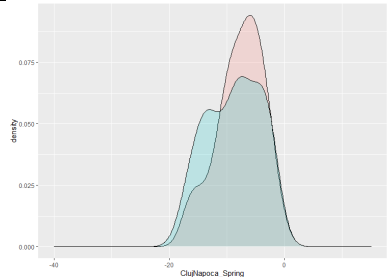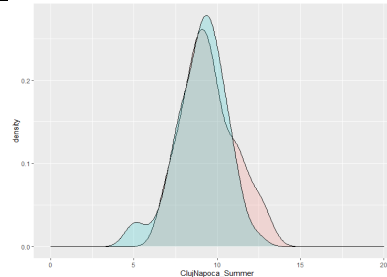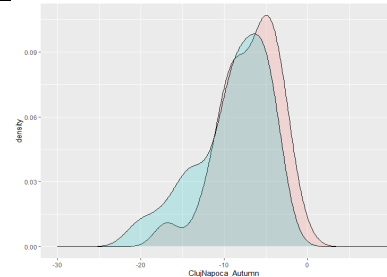

Baia-Mare

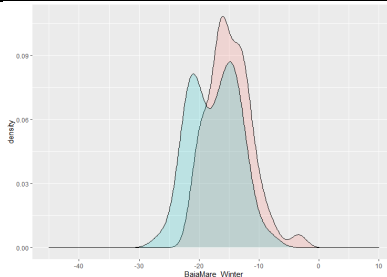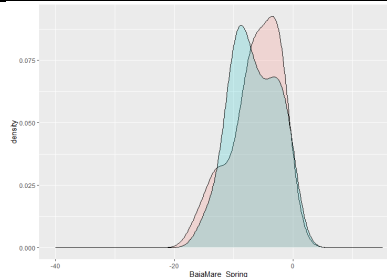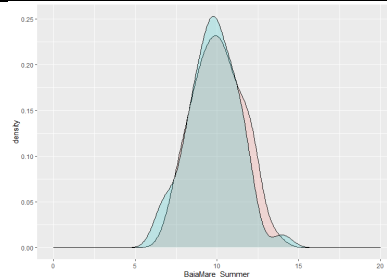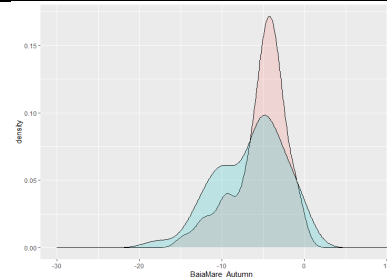

Sibiu

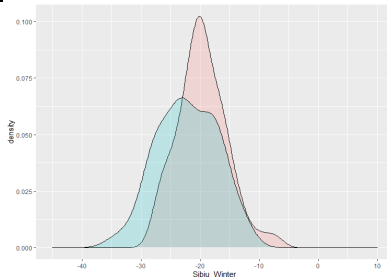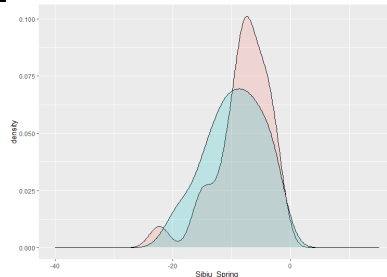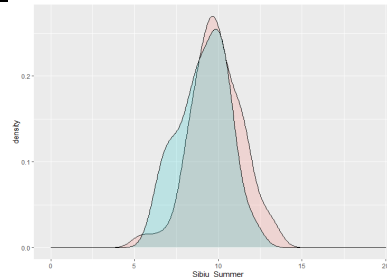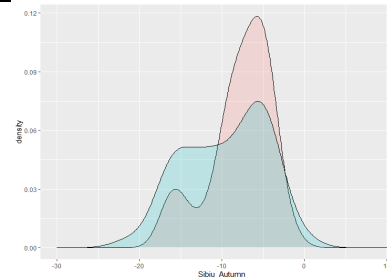



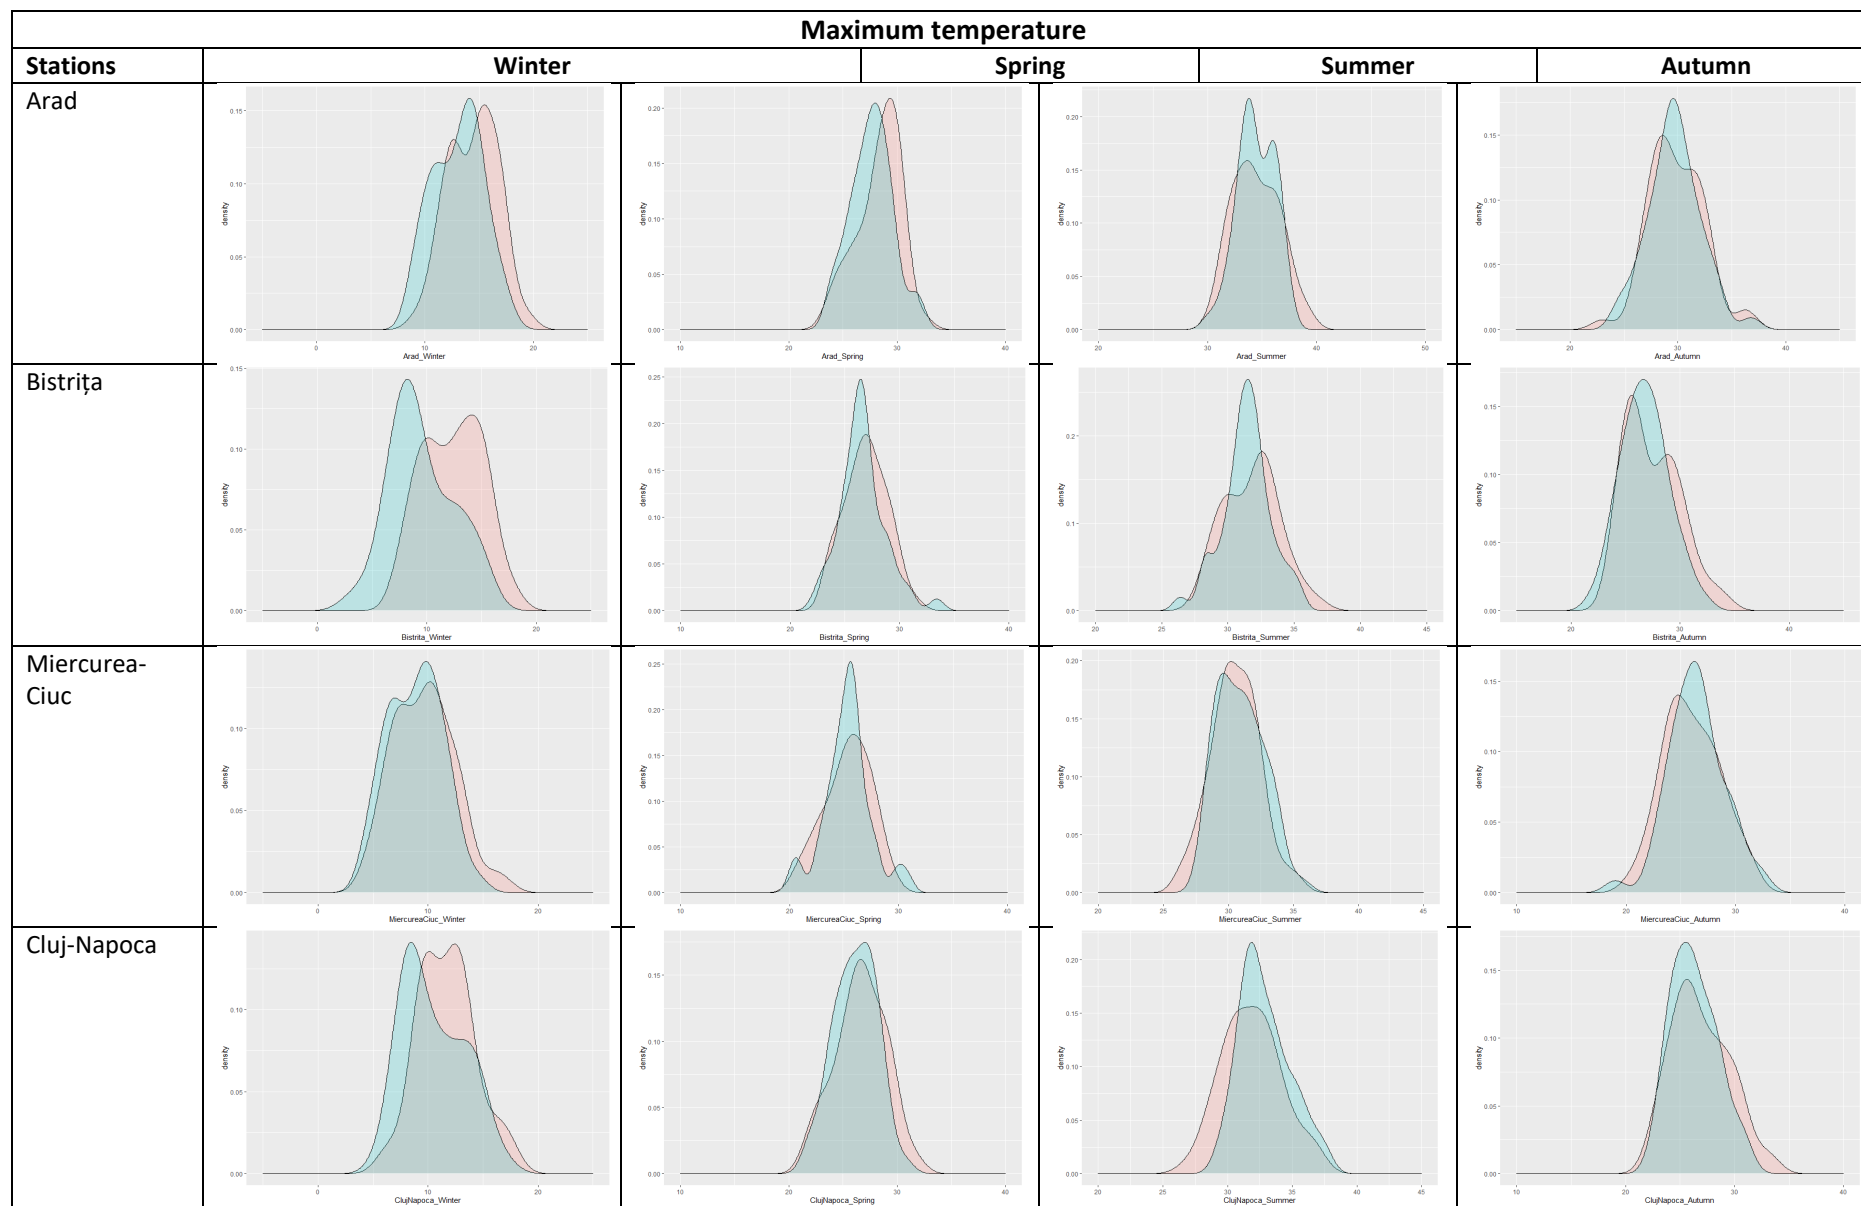

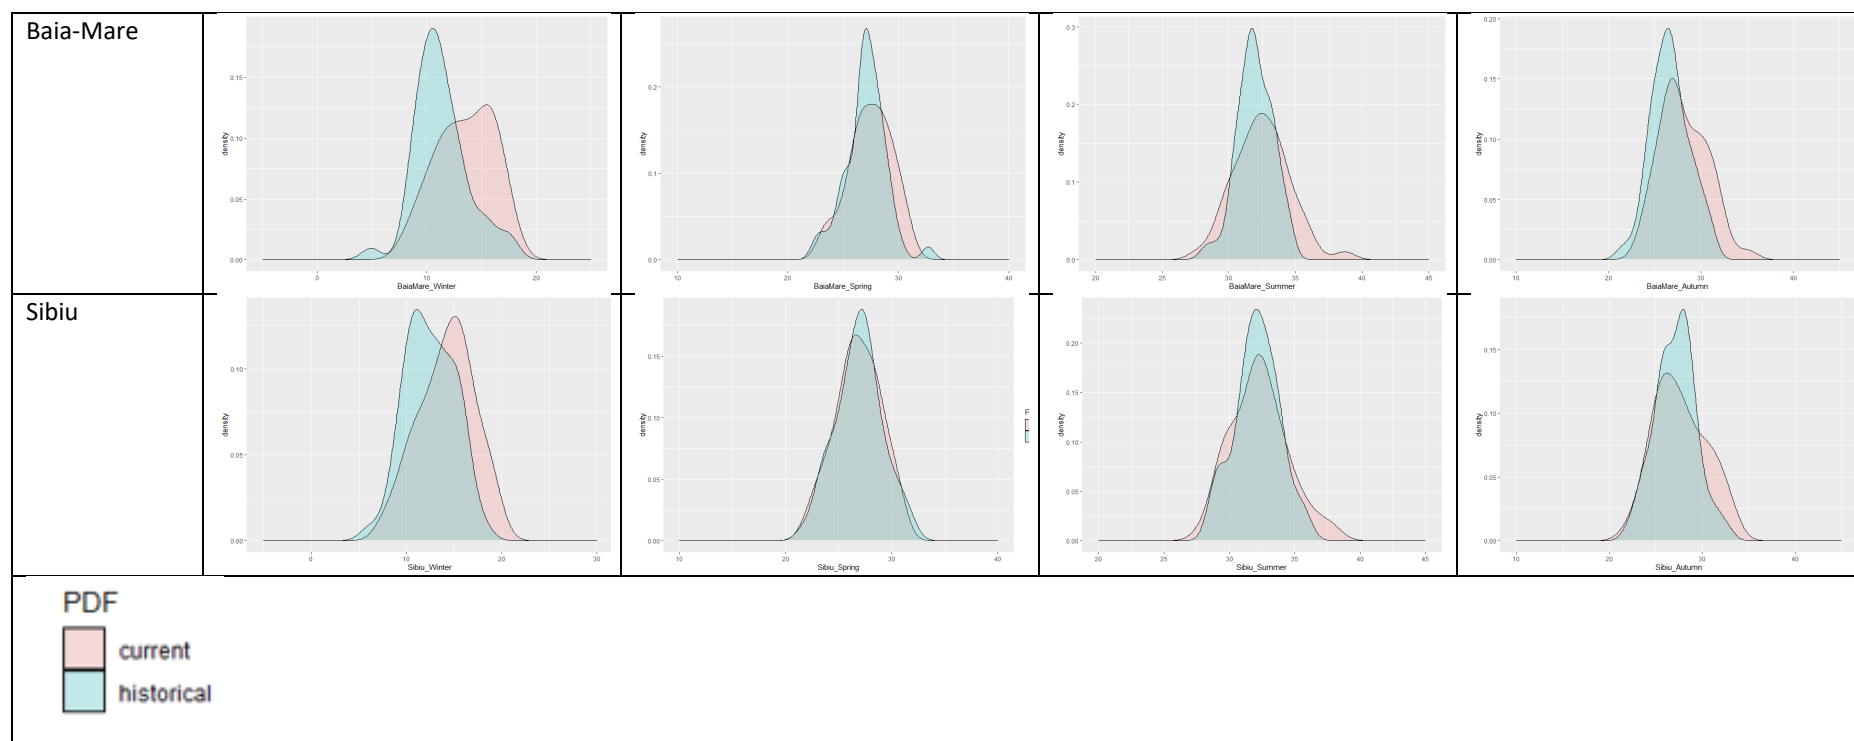

Figure S3. Comparison of distributions using  $\chi^2$  homogeneity test of daily (24-hours) and daytime mean, maximum and minimum temperature between historical (1871–1918) and current (1971–2020) periods in the Carpathian Region. Green – historical period, pink – current period



Table S2. Comparison of standard deviation using F-test of daily (24-hours) and daytime mean temperature, maximum and minimum temperature and precipitation between historical (1871–1918) and current (1971–2020) periods in the Carpathian Region. *sig.* indicates significant difference at 0.05 significance level.

| Changes in standard deviation |                |                             |        |        |        |
|-------------------------------|----------------|-----------------------------|--------|--------|--------|
| Stations                      |                | 24-hours mean temperature   |        |        |        |
|                               |                | Winter                      | Spring | Summer | Autumn |
| 1                             | Arad           |                             |        | sig.   |        |
| 2                             | Bistrița       |                             |        | sig.   |        |
| 3                             | Miercurea Ciuc |                             |        | sig.   |        |
| 4                             | Cluj-Napoca    |                             |        | sig.   |        |
| 5                             | Baia Mare      |                             |        | sig.   |        |
| 6                             | Sibiu          |                             |        | sig.   |        |
| 7                             | Budapest       | sig.                        |        | sig.   |        |
| 8                             | Debrecen       |                             |        | sig.   |        |
| 9                             | Pécs           |                             |        | sig.   |        |
| 10                            | Szeged         | sig.                        |        | sig.   |        |
| 11                            | Uzhhorod       | sig.                        |        |        | sig.   |
| 12                            | Kosice         |                             |        | sig.   |        |
| 13                            | Zagreb         | sig.                        | sig.   | sig.   |        |
| Stations                      |                | Precipitation               |        |        |        |
|                               |                | Winter                      | Spring | Summer | Autumn |
| 1                             | Arad           |                             |        |        |        |
| 2                             | Bistrița       |                             |        |        |        |
| 3                             | Miercurea Ciuc |                             |        |        |        |
| 4                             | Cluj-Napoca    |                             | sig.   |        |        |
| 5                             | Baia Mare      |                             |        |        |        |
| 6                             | Sibiu          |                             |        |        |        |
| 7                             | Budapest       |                             |        |        |        |
| 8                             | Debrecen       | sig.                        |        |        |        |
| 9                             | Pécs           |                             | sig.   | sig.   |        |
| 10                            | Szeged         |                             |        |        |        |
| 11                            | Uzhhorod       |                             |        |        |        |
| 12                            | Kosice         | sig.                        |        |        |        |
| 13                            | Zagreb         |                             |        |        |        |
| Stations                      |                | Daytime mean temperature    |        |        |        |
|                               |                | Winter                      | Spring | Summer | Autumn |
| 1                             | Arad           |                             |        | sig.   |        |
| 2                             | Bistrița       |                             |        | sig.   |        |
| 3                             | Miercurea Ciuc |                             |        | sig.   |        |
| 4                             | Cluj-Napoca    |                             |        | sig.   |        |
| 5                             | Baia Mare      |                             |        | sig.   |        |
| 6                             | Sibiu          |                             |        | sig.   |        |
| Stations                      |                | Daytime minimum temperature |        |        |        |
|                               |                | Winter                      | Spring | Summer | Autumn |
| 1                             | Arad           |                             |        |        |        |
| 2                             | Bistrița       |                             |        | sig.   | sig.   |
| 3                             | Miercurea Ciuc |                             |        | sig.   |        |
| 4                             | Cluj-Napoca    |                             |        |        |        |
| 5                             | Baia Mare      |                             |        |        | sig.   |
| 6                             | Sibiu          |                             |        |        | sig.   |
| Stations                      |                | Daytime maximum temperature |        |        |        |
|                               |                | Winter                      | Spring | Summer | Autumn |
| 1                             | Arad           |                             |        |        |        |
| 2                             | Bistrița       |                             |        |        |        |
| 3                             | Miercurea Ciuc |                             |        |        |        |
| 4                             | Cluj-Napoca    |                             |        |        |        |
| 5                             | Baia Mare      |                             |        | sig.   |        |
| 6                             | Sibiu          |                             |        | sig.   | sig.   |

Table S3. The multiannual 24-hour temperature means and multiannual means in amount of precipitation for the periods of 1871-1918 and 1971-2020 in the Carpathian Region.

| Stations |                | 24-hours mean temperature in °C |        |        |        |           |        |        |        |
|----------|----------------|---------------------------------|--------|--------|--------|-----------|--------|--------|--------|
|          |                | 1871-1918                       |        |        |        | 1970-2020 |        |        |        |
|          |                | Winter                          | Spring | Summer | Autumn | Winter    | Spring | Summer | Autumn |
| 1        | Arad           | -0.2                            | 11.0   | 20.6   | 11.3   | 0.6       | 11.1   | 20.9   | 10.9   |
| 2        | Bistrița       | -3.5                            | 8.8    | 18.7   | 8.8    | -2.0      | 9.4    | 18.8   | 8.7    |
| 3        | Miercurea Ciuc | -6.0                            | 6.4    | 16.4   | 6.7    | -5.3      | 6.4    | 16.1   | 5.9    |
| 4        | Cluj-Napoca    | -3.1                            | 9.0    | 18.4   | 8.7    | -1.6      | 9.5    | 18.7   | 8.9    |
| 5        | Baia Mare      | -1.5                            | 9.7    | 18.9   | 9.6    | -0.1      | 10.6   | 19.8   | 10.2   |
| 6        | Sibiu          | -2.5                            | 9.2    | 18.5   | 8.9    | -1.3      | 9.6    | 18.9   | 9.1    |
| 7        | Budapest       | -0.4                            | 10.6   | 20.2   | 10.5   | 1.8       | 12.2   | 21.6   | 11.7   |
| 8        | Debrecen       | -1.7                            | 9.8    | 19.7   | 9.5    | -0.1      | 11.1   | 20.5   | 10.5   |
| 9        | Pécs           | 0.1                             | 10.7   | 20.1   | 11.0   | 1.0       | 11.2   | 20.7   | 11.2   |
| 10       | Szeged         | -0.5                            | 10.8   | 20.8   | 11.0   | 0.6       | 11.4   | 21.0   | 11.0   |
| 11       | Uzhhorod       | -1.6                            | 9.7    | 19.0   | 9.6    | -1.0      | 10.5   | 19.7   | 10.0   |
| 12       | Kosice         | -2.4                            | 8.1    | 17.6   | 8.3    | -1.1      | 9.9    | 19.3   | 9.3    |
| 13       | Zágreb         | 0.9                             | 11.2   | 20.3   | 11.2   | 2.9       | 12.6   | 21.6   | 12.2   |
| Stations |                | Precipitation in mm             |        |        |        |           |        |        |        |
|          |                | 1871-1918                       |        |        |        | 1970-2020 |        |        |        |
|          |                | Winter                          | Spring | Summer | Autumn | Winter    | Spring | Summer | Autumn |
| 1        | Arad           | 117.2                           | 167.3  | 195.8  | 154.7  | 108.8     | 148.5  | 204.2  | 130.8  |
| 2        | Bistrița       | 106.8                           | 166.4  | 256.5  | 156.9  | 128.4     | 175.2  | 246.9  | 154.6  |
| 3        | Miercurea Ciuc | 73.5                            | 131.2  | 229.7  | 105.1  | 78.5      | 146.9  | 248.2  | 110.6  |
| 4        | Cluj-Napoca    | 75.1                            | 160.2  | 254.3  | 123.4  | 81.8      | 151.7  | 243.4  | 119.1  |
| 5        | Baia Mare      | 219.4                           | 239.0  | 320.0  | 238.1  | 206.5     | 207.0  | 266.8  | 208.4  |
| 6        | Sibiu          | 77.9                            | 176.4  | 290.0  | 134.0  | 78.2      | 165.2  | 260.5  | 132.8  |
| 7        | Budapest       | 118.1                           | 176.4  | 176.5  | 164.6  | 109.0     | 128.8  | 166.2  | 130.3  |
| 8        | Debrecen       | 105.9                           | 151.2  | 209.4  | 154.0  | 101.6     | 139.4  | 198.8  | 122.7  |
| 9        | Pécs           | 126.1                           | 218.0  | 227.5  | 217.0  | 113.2     | 155.4  | 212.7  | 162.4  |
| 10       | Szeged         | 98.1                            | 150.6  | 169.7  | 138.6  | 89.8      | 124.9  | 181.8  | 117.1  |
| 11       | Uzhhorod       | 152.5                           | 171.9  | 257.7  | 233.8  | 168.7     | 168.3  | 242.9  | 184.2  |
| 12       | Kosice         | 96.9                            | 148.3  | 244.8  | 173.2  | 88.5      | 143.4  | 246.6  | 141.5  |
| 13       | Zágreb         | 156.2                           | 241.3  | 265.0  | 267.9  | 156.0     | 194.8  | 265.8  | 259.0  |

Sen's Slope values (°C/decade) for 24-hours mean temperature (historical period 1871-1918)

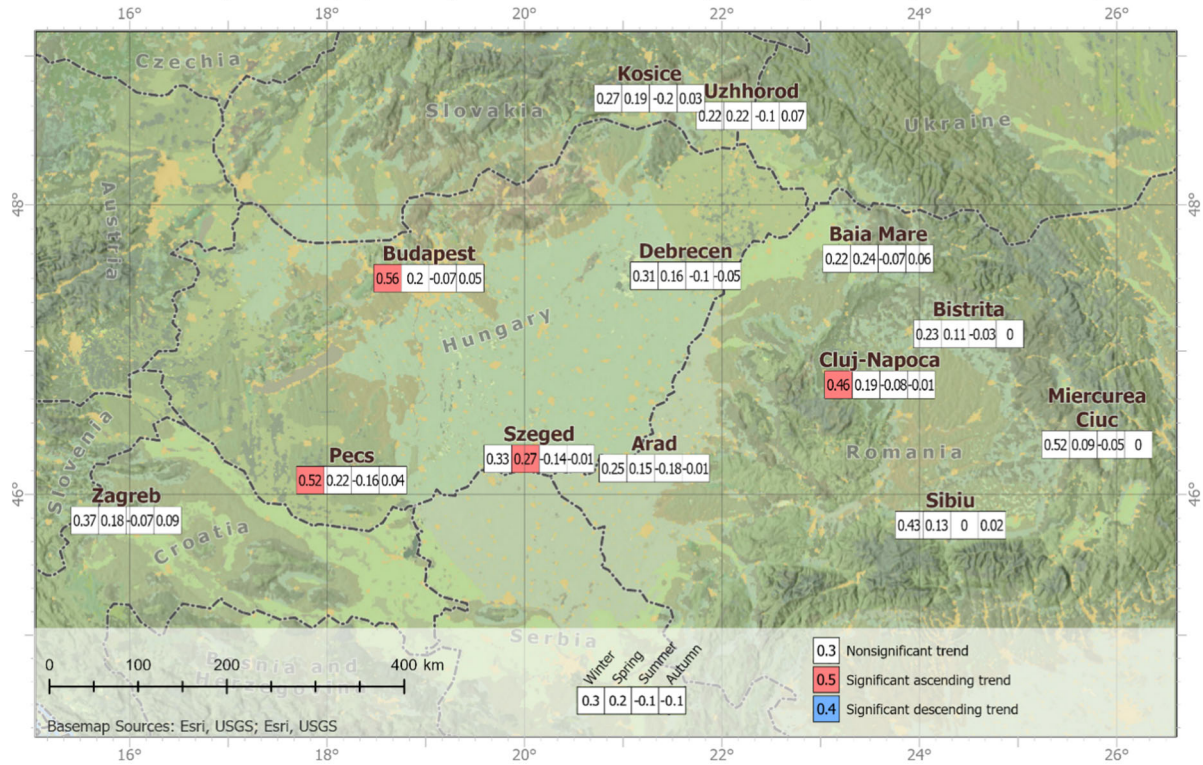

Sen's Slope values (°C/decade) for 24-hours mean temperature (recent period 1970-2020)

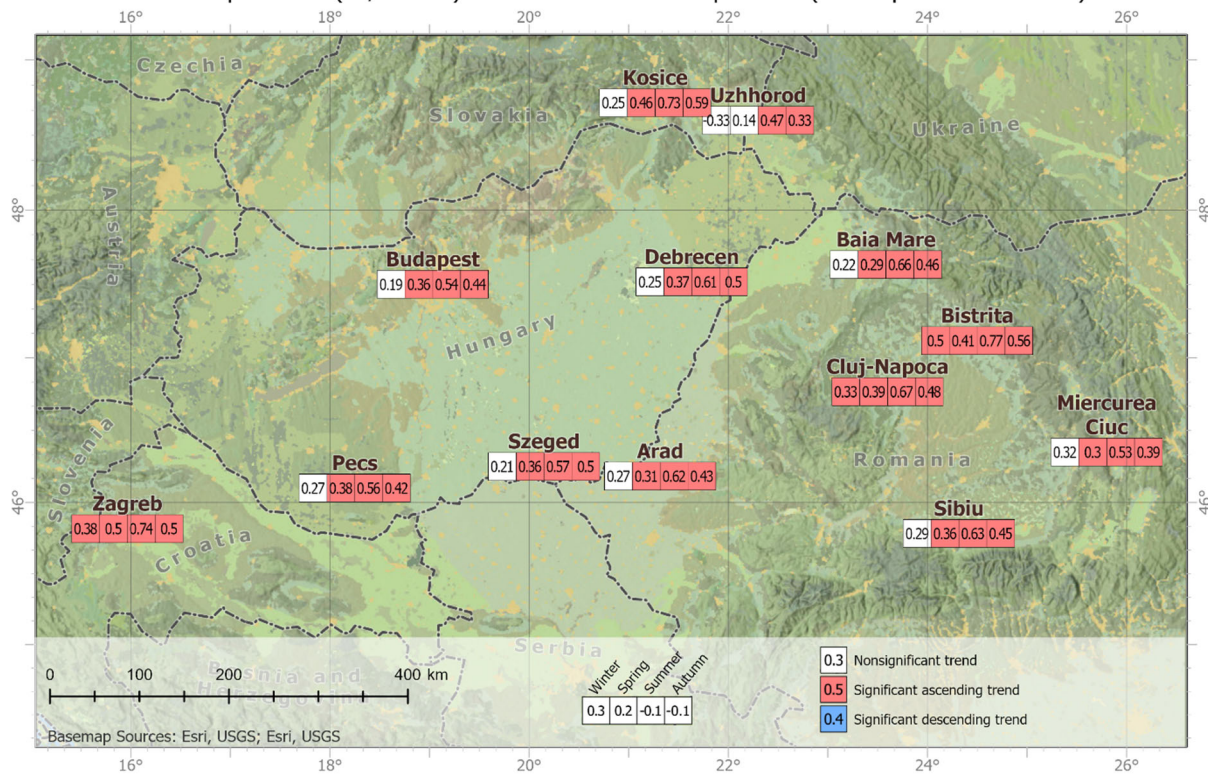



Sen's Slope values (°C/decade) for daytime mean temperature (historical period 1871-1918)

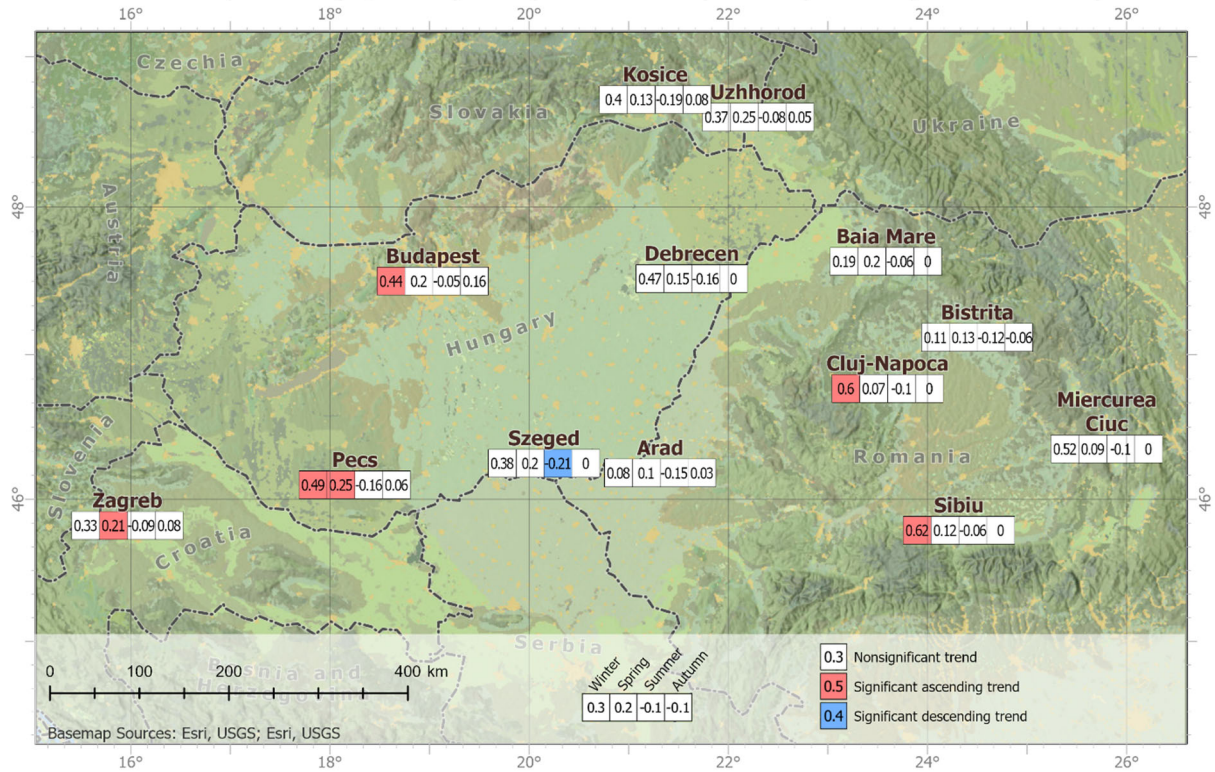

Sen's Slope values (°C/decade) for daytime mean temperature (recent period 1970-2020)

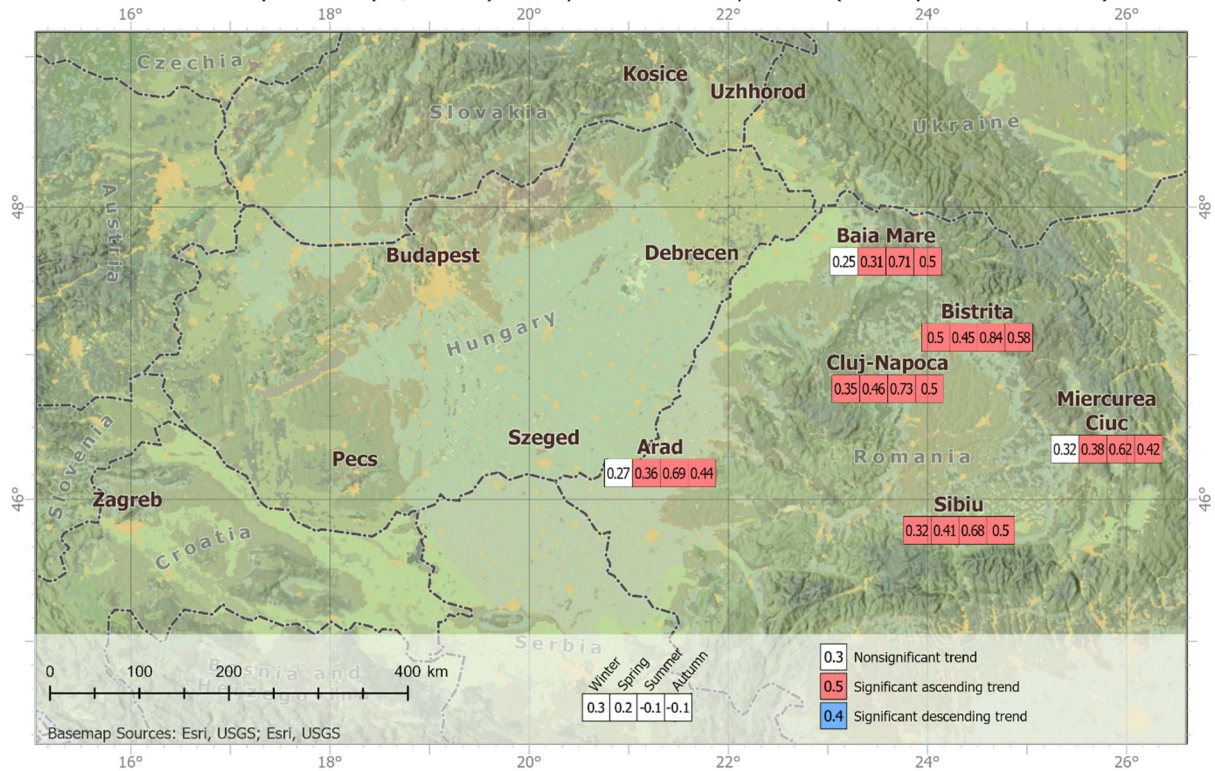



Sen's Slope values (°C/decade) for minimum temperature (historical period 1871-1918)

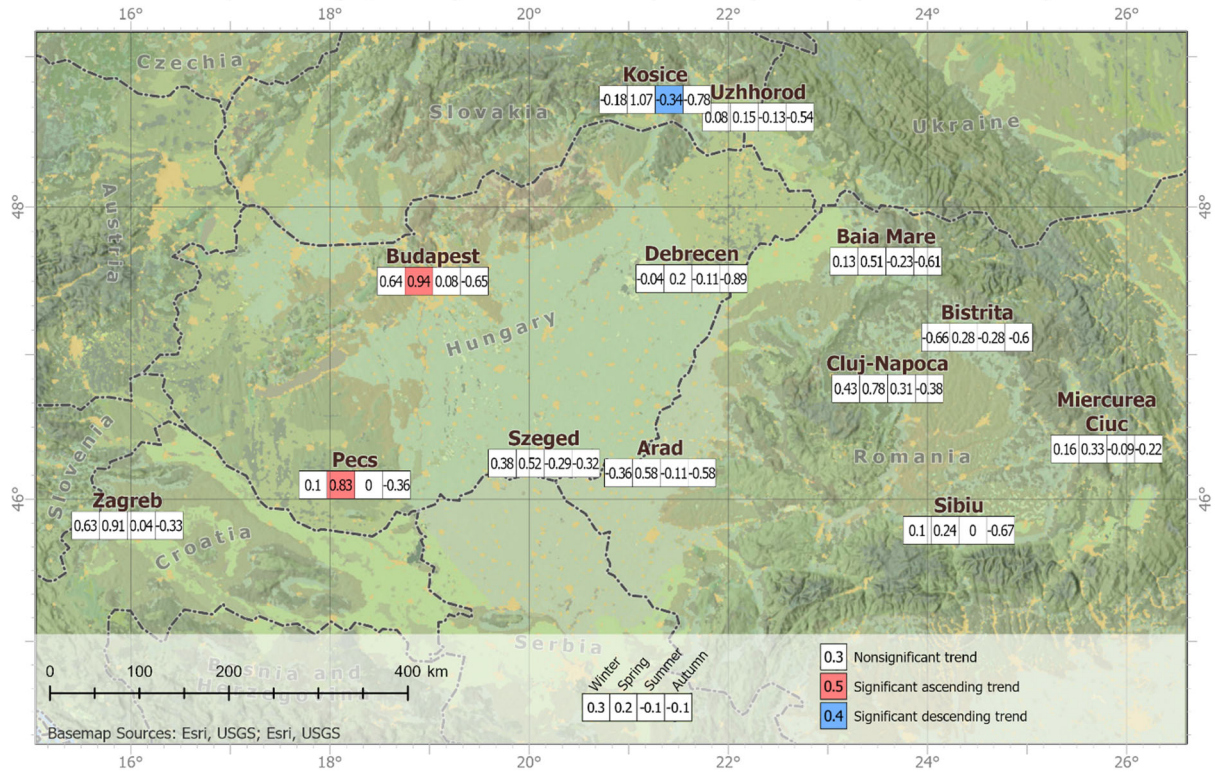

Sen's Slope values (°C/decade) for minimum temperature (recent period 1970-2020)

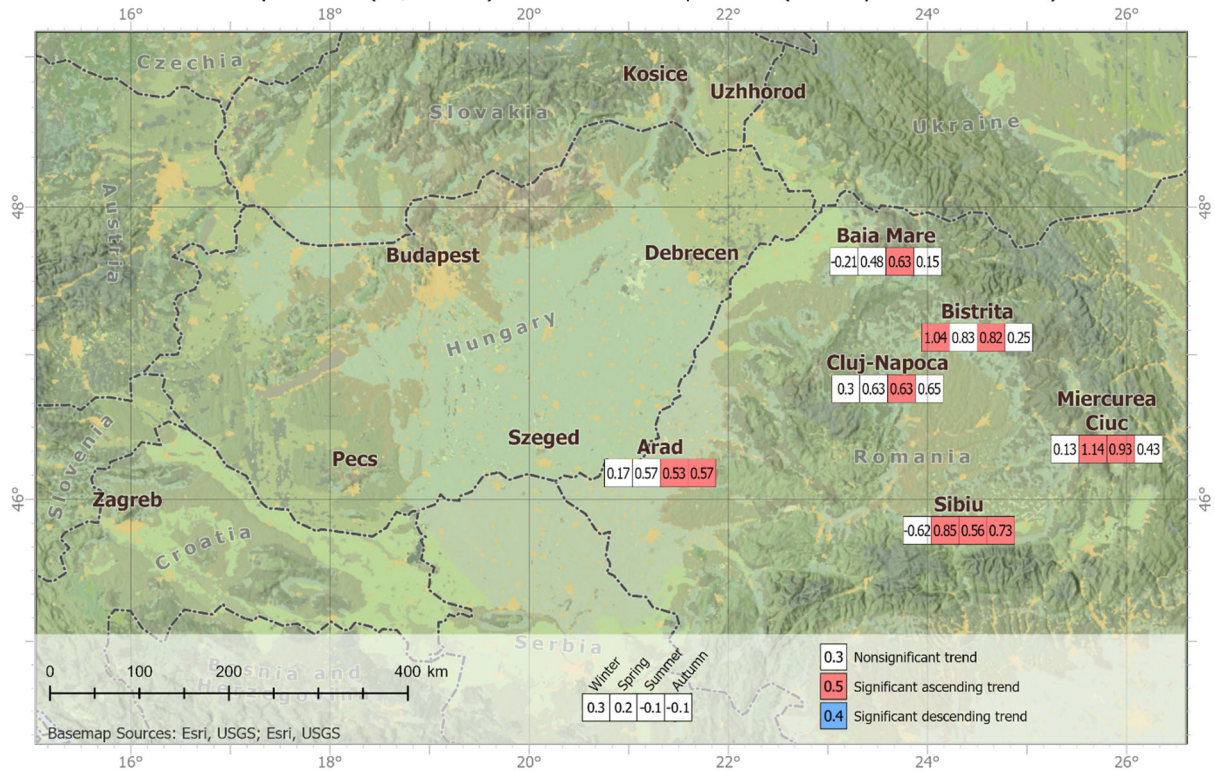



Sen's Slope values (°C/decade) for maximum temperature (historical period 1871-1918)

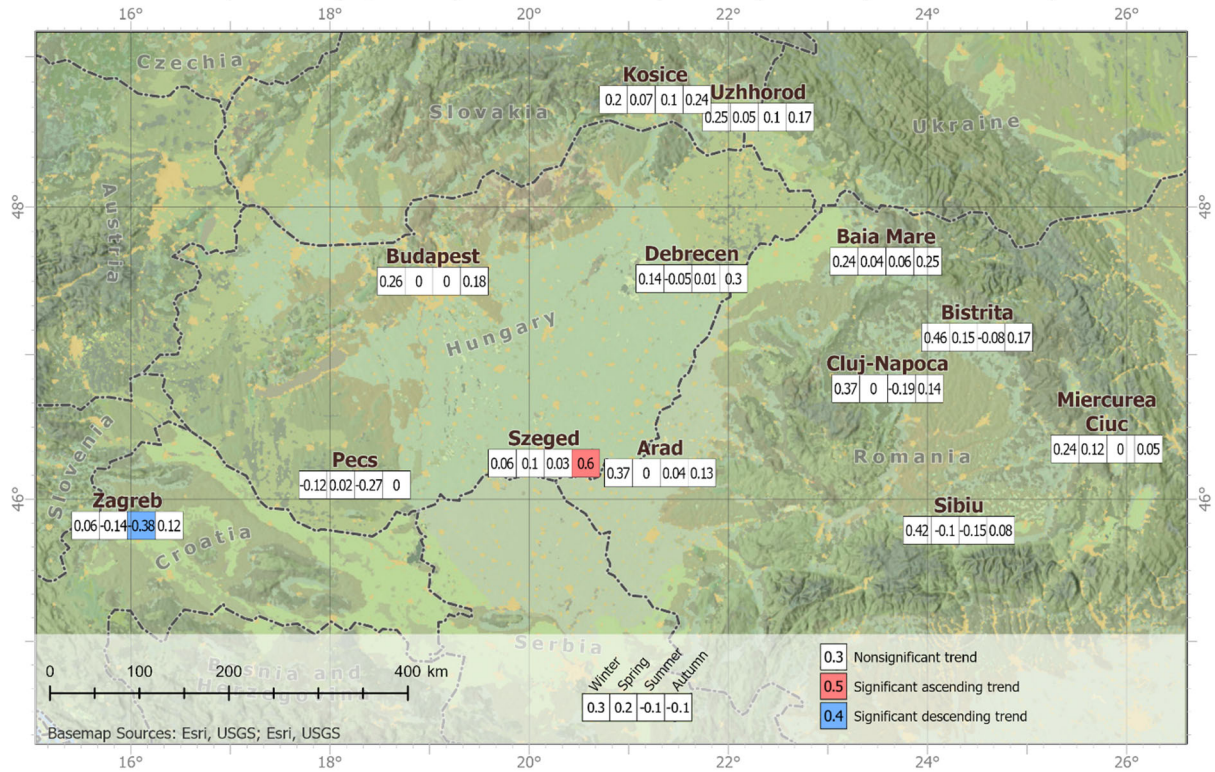

Sen's Slope values (°C/decade) for maximum temperature (recent period 1970-2020)

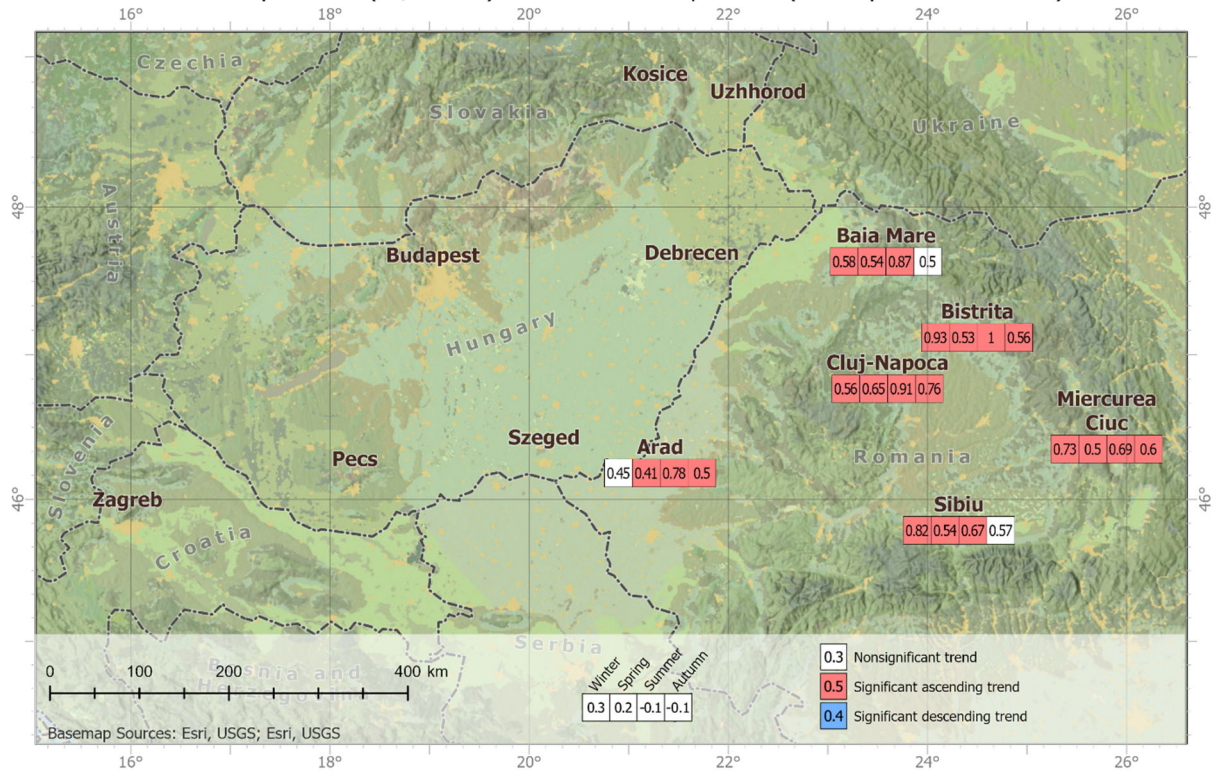



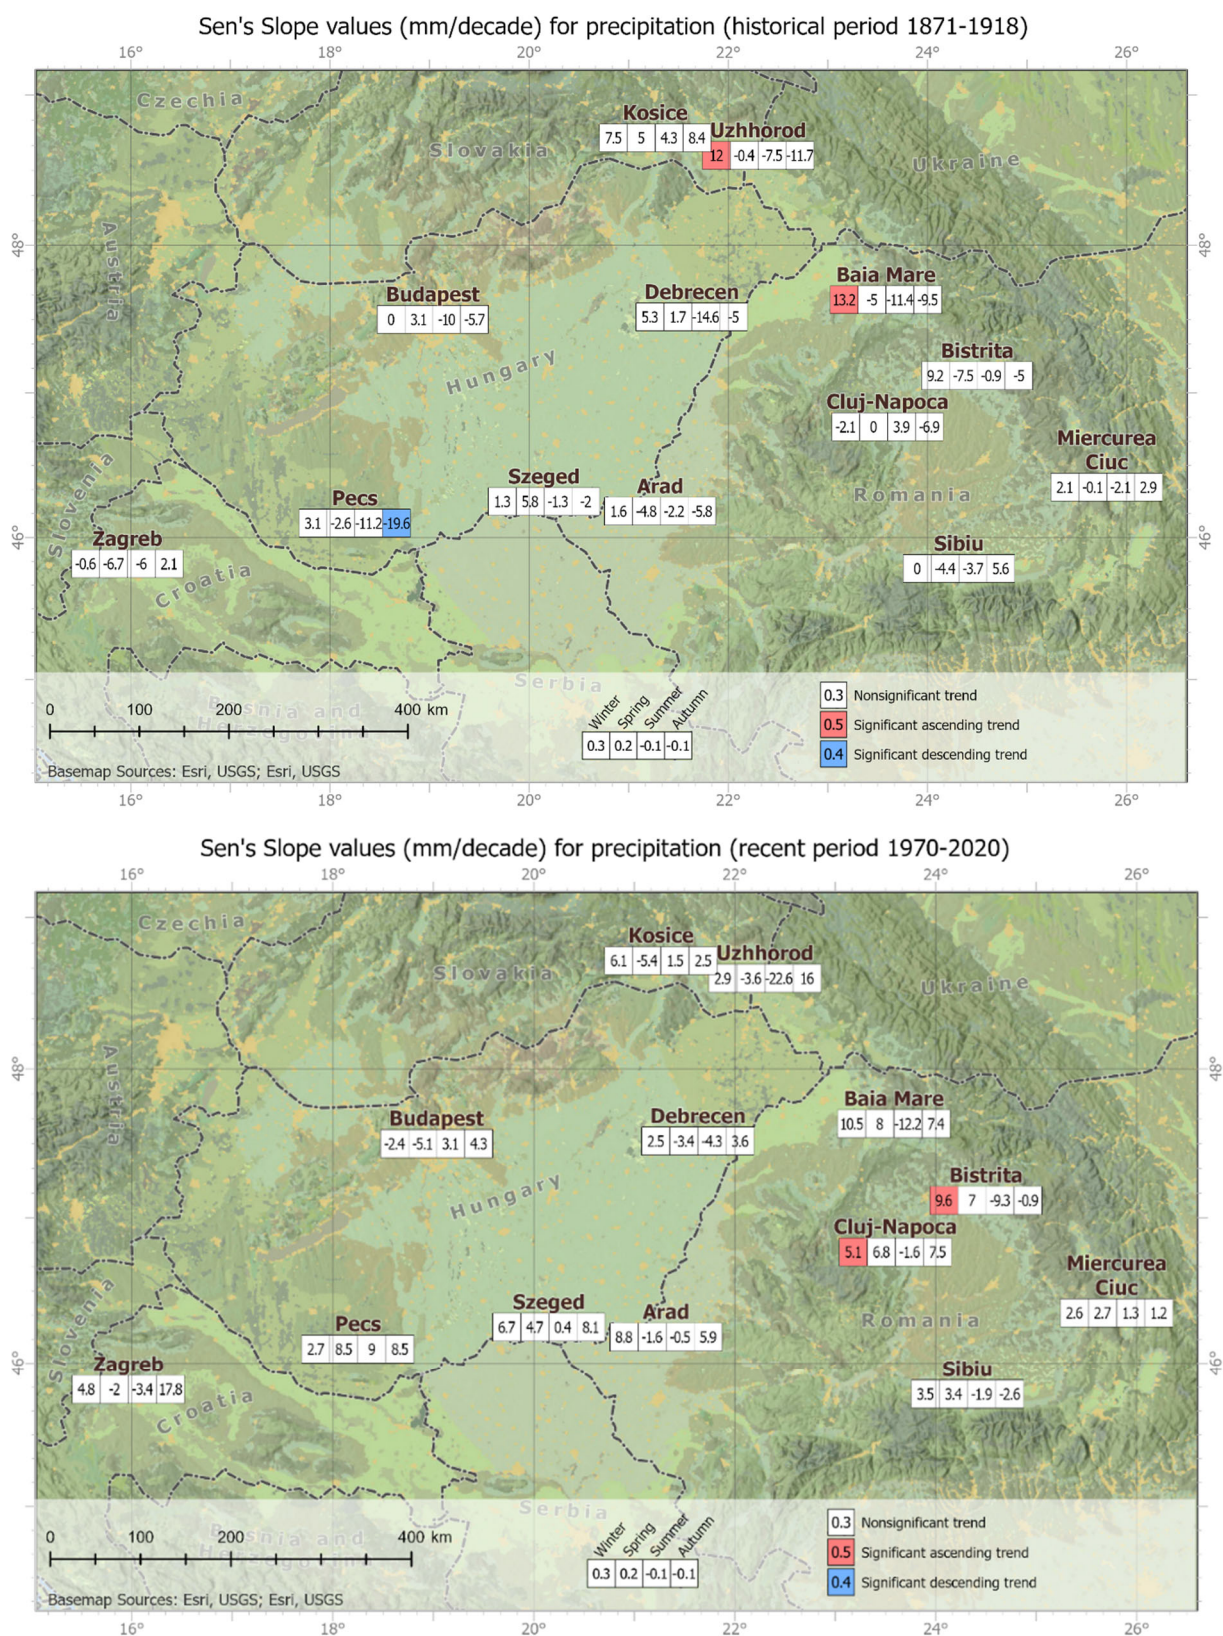

Figure S4. Spatial distribution of trends for historical (1871–1918) and current (1971–2020) periods in the Carpathian Region (see Table 2., 4., and 6).
